# Supplementary material
Source: PubMed Central journal article supplement (PMC11148891)
Supplement: sj-pdf-1-jfm-10.1177_1098612X15571880.pdf [file sj-pdf-1-jfm-10.1177_1098612X15571880.pdf]

# Recommandations concertées de l'ISFM pour la Prise en Charge Pratique du Diabète Sucré chez le Chat

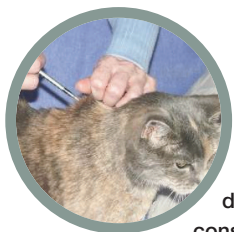

**Intérêt pratique:** Le diabète sucré est une dysendocrinie fréquente chez le chat, dont la prévalence semble être en augmentation. Le pronostic peut être bon quand la maladie est bien contrôlée, mais la prise en charge clinique présente des difficultés, à la fois pour l'équipe vétérinaire et pour le propriétaire. Ces Recommandations de l'ISFM ont été développées par un panel international d'experts indépendants, regroupant vétérinaires praticiens et professeurs, afin de proposer des conseils pratiques pour la prise en charge du diabète simple (non compliqué) chez le chat.

**Difficultés cliniques:** Bien que le diagnostic du diabète soit généralement simple à établir, sa prise en charge optimale peut s'avérer complexe. L'objectif clinique doit être de réduire, voire de supprimer, les signes cliniques de la maladie grâce à un protocole thérapeutique qui convienne au propriétaire, tout en prévenant le développement d'une hypoglycémie insulino-induite ou d'autres complications. L'optimisation du poids du chat, la consommation d'un régime alimentaire adapté et l'utilisation d'une insuline à action prolongée (insuline protamine zinc, insuline glargine ou insuline détémir, par exemple) sont autant de facteurs susceptibles d'améliorer le contrôle de la glycémie dans la plupart des cas. Des éléments de preuve montrent qu'en améliorant le contrôle de la glycémie et en supprimant la glucotoxicité, les chances de rémission peuvent être augmentées. Les préoccupations du propriétaire et son implication sont des aspects importants de la prise en charge. Si les propriétaires bénéficient d'un soutien suffisant et s'ils sont capables de s'impliquer activement dans une surveillance de la glycémie à domicile, la glycémie pourra être mieux contrôlée. D'autres paramètres devront également être surveillés pour évaluer la réponse à l'insulinothérapie. Les doses d'insuline devront toujours être ajustées avec prudence et pas trop fréquemment – sauf en cas d'hypoglycémie avérée.

**Base factuelle:** Le Panel a établi ces Recommandations après avoir minutieusement analysé la littérature existante et la qualité des études publiées. Elles forment donc un consensus sur la prise en charge pratique des chats diabétiques, fondé sur les données et l'expérience cliniques actuelles. A de nombreux égards cependant, nous manquons cruellement de données, et d'autres études devront être réalisées pour améliorer nos connaissances et affiner les recommandations pour la prise en charge clinique de cette maladie courante.

## Introduction

Le diabète sucré est une maladie fréquente chez le chat, dont la prévalence en clientèle généraliste est estimée à 1 cas sur 100 à 500.<sup>1-3</sup> Il existe également des preuves que cette prévalence augmente, peut-être au moins en partie à cause de l'augmentation de la prévalence de l'obésité.<sup>4</sup>

La prise en charge du diabète sucré félin représente un défi, tant pour l'équipe vétérinaire que pour les propriétaires, et ces derniers ont besoin d'être fortement soutenus car ils devront poursuivre le traitement à domicile. Les études ont mis en évidence une survie médiane de 13 à 29 mois chez le chat diabétique, avec une survie

supérieure chez les chats mieux stabilisés, et un grand nombre de décès dus à d'autres maladies que le diabète.<sup>5-7</sup> Le pronostic de ces animaux est donc bon quand la maladie est bien prise en charge.

Ces Recommandations ont été développées par un panel international d'experts, praticiens et professeurs, dans le but de fournir des conseils pratiques pour la prise en charge du diabète félin simple, en se basant sur les meilleures preuves actuellement disponibles. Ces recommandations ne prétendent pas couvrir de manière exhaustive l'ensemble des aspects de la prise en charge du diabète sucré, et des références à d'autres sources sont fournies le cas échéant.

## isfm

**Andrew H Sparkes**  
BVetMed PhD DipECVIM  
MANZCVS MRCVS  
Directeur Vétérinaire, ISFM<sup>1</sup>  
Président du Panel\*

**Martha Cannon**  
BA VetMB DSAM(Fel) MRCVS<sup>2</sup>

**David Church**  
BVSc PhD MANZCVS MRCVS<sup>3</sup>

**Linda Fleeman**  
BVSc PhD MANZCVS<sup>4</sup>

**Andrea Harvey**  
BVSc DSAM(Fel) DipECVIM  
MANZCVS MRCVS<sup>5</sup>

**Margarethe Hoenig**  
DrMedVet PhD<sup>6</sup>

**Mark E Peterson**  
DVM DipACVIM<sup>7</sup>

**Claudia E Reusch**  
DVM DipECVIM<sup>8</sup>

**Samantha Taylor**  
BVetMed(Hons) CertSAM  
DipECVIM MRCVS  
Coordinateur de l'Education à  
Distance de l'International Cat  
Care<sup>1</sup>

**Dan Rosenberg**  
DVM PhD<sup>9</sup>

<sup>1</sup>International Cat Care/ISFM,  
Tisbury, Wiltshire SP3 6LD, UK  
<sup>2</sup>Oxford Cat Clinic,  
Oxford OX2 9JU, UK

<sup>3</sup>Professor, Small Animal Medicine  
and Surgery Group,  
The Royal Veterinary College,  
North Mymms, Hatfield,  
Hertfordshire AL9 7TA, UK

<sup>4</sup>Animal Diabetes Australia,  
Rowville Veterinary Clinic, Rowville,  
VIC 3178, Australia

<sup>5</sup>Small Animal Specialist Hospital,  
North Ryde, NSW 2113, Australia

<sup>6</sup>Professor, Department of  
Veterinary Clinical Medicine,  
University of Illinois College  
of Veterinary Medicine,  
Urbana-Champaign, Illinois, USA

<sup>7</sup>Animal Endocrine Clinic,  
21 West 100th Street, New York,  
NY 10025, USA

<sup>8</sup>Professor & Director, Clinic for  
Small Animal Internal Medicine,  
Vetsuisse Faculty, University of  
Zurich, Winterthurerstrasse 260,  
8057 Zurich, Switzerland

<sup>9</sup>Micen Vet Centre, 58 Rue Auguste  
Perret, Parc Technologique,  
Europarc, 9400 Créteil, France

\*Correspondance:  
andy@icatcare.org

## Epidémiologie, pathogénie et diagnostic

Dans la majorité des cas, le diabète félin s'apparente d'un point de vue pathogénique au diabète humain de type 2,<sup>8-11</sup> avec un dysfonctionnement des cellules bêta et une insulino-résistance ; le diabète de type 1 (à médiation immune) est rare dans l'espèce féline.<sup>12</sup> Chez les chats diabétiques, le dysfonctionnement des cellules bêta induit généralement un déficit insulinaire et serait provoqué par un certain nombre de facteurs, incluant un dépôt d'amyloïde dans les îlots de Langerhans, une glucotoxicité et éventuellement des lésions cellulaires provoquées par des dérivés actifs de l'oxygène et/ou des cytokines inflammatoires.<sup>13</sup> De nombreux facteurs peuvent contribuer à l'insulino-résistance – l'obésité est une cause fréquente, mais les autres facteurs incluent certaines dysendocrinies concomitantes (acromégalie, hypercorticisme, par exemple), le diabète iatrogène (corticoïdes, progestagènes...) et la pancréatite. Notons que lorsqu'il est possible de réduire l'insulino-résistance et d'améliorer le fonctionnement des cellules bêta, une rémission peut parfois être obtenue ; en d'autres termes, l'insulinothérapie exogène peut ne plus être nécessaire, même si la rémission est seulement temporaire dans certains cas.<sup>14</sup>

### Signes cliniques et facteurs de risque

Les signes cliniques du diabète sucré incluent polyurie et polydipsie (PUPD), léthargie, perte de poids et polyphagie. Les signes moins fréquents incluent faiblesse, plantigradie, dépression, et anorexie (lors d'acidocétose notamment).

De nombreuses études ont identifié des facteurs de risque pour le développement du diabète sucré félin, bien que la présence de maladies concomitantes non identifiées (acromégalie, par exemple) puisse avoir eu une influence sur les résultats obtenus. Les principaux facteurs de risque décrits incluent :

- ❖ **L'obésité** Elle diminue la sensibilité à l'insuline et les chats obèses ont quatre fois plus de risques de développer un diabète sucré que les chats de poids optimal.<sup>2-4,8,15-19</sup>
- ❖ **L'âge** Les chats de plus de 7 ans sont les plus à risque.<sup>2,4,18</sup>
- ❖ **La race** Les Burmese ont été identifiés comme étant plus à risque dans des études menées en Australie, en Nouvelle-Zélande et en Europe.<sup>2,20,21</sup>
- ❖ **L'activité physique** Les chats d'intérieur et les chats inactifs sont plus à risque.<sup>2,3,20,22</sup>
- ❖ **Le sexe** Les mâles et les chats stérilisés sont plus à risque.<sup>2-4,18,20,21,23</sup>
- ❖ **Les médicaments** Les corticoïdes et les progestagènes peuvent induire une insulino-résistance et prédisposer les chats au diabète sucré.<sup>2,24,25</sup>

L'hypothèse  
d'une  
hyperglycémie  
(et glycosurie)  
de stress doit  
être exclue  
avant  
d'envisager tout  
traitement.

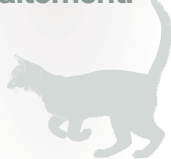

### Diagnostic

Le diagnostic du diabète repose habituellement sur l'observation d'une hyperglycémie et d'une glycosurie persistantes associées à des signes cliniques compatibles. L'hypothèse d'une hyperglycémie (et glycosurie) de stress doit être exclue avant d'envisager tout traitement – le stress induit rarement une hyperglycémie > 16 mmol/l (288 mg/dl) (bien que la glycémie puisse être occasionnellement très élevée) et celle-ci rétrocede généralement en quelques heures. Des dosages sanguins et urinaires répétés permettront de confirmer une hyperglycémie persistante liée à un diabète, et le suivi à domicile de ces paramètres peut être utile en cas de doute.

La fructosamine sérique reflète la glycémie moyenne des 7 derniers jours environ,<sup>26</sup> et n'est donc pas influencée par l'hyperglycémie de stress transitoire (à condition que son amplitude et sa durée restent modérées). Sa mesure peut être utile pour confirmer un diagnostic de diabète sucré et évaluer le contrôle de la glycémie (voir page 245), bien que son taux puisse ne pas être augmenté chez les chats souffrant de diabète récent et/ou léger.<sup>23,26-28</sup>

### Evaluation du chat diabétique

L'évaluation d'un chat avec suspicion de diabète doit inclure :

- ❖ Une anamnèse et un examen clinique détaillés.
- ❖ Un bilan biochimique de base.
- ❖ Une analyse urinaire complète, idéalement avec culture (particulièrement en cas de culot actif).  
Idéalement, l'évaluation devrait aussi inclure :
- ❖ Une numération formule sanguine (NFS).
- ❖ Un dosage sérique de la fructosamine (même s'il n'est pas toujours nécessaire au diagnostic et au suivi).
- ❖ Un dosage sérique de la thyroxine chez les chats âgés pour exclure une hyperthyroïdie.

En raison de la prévalence élevée des maladies concomitantes, incluant la pancréatite, une échographie abdominale et/ou un dosage de l'immunoréactivité de la lipase pancréatique sérique peuvent être indiqués (notamment chez les chats déprimés ou à appétit réduit), bien que leur interprétation ne soit pas toujours simple.<sup>29</sup>

Une acidocétose se développe chez un certain pourcentage de chats diabétiques non traités, et doit être suspectée en cas de dépression, anorexie, vomissements, faiblesse, collapsus ou état moribond. Son diagnostic repose sur l'observation de ces signes cliniques avec confirmation de taux sanguins ou urinaires élevés de corps cétoniques et d'une acidose métabolique, associés à une hyperglycémie persistante.

Les vétérinaires doivent être vigilants et surveiller l'apparition éventuelle de complications diabétiques (hypoglycémie, acidocétose, neuropathie diabétique, par exemple) ou rechercher la présence de maladie(s) concomitante(s), notamment si la réponse au traitement est insuffisante ou irrégulière.

## Objectifs globaux de la prise en charge des chats diabétiques

Malgré un pronostic favorable pour les chats bien traités, une euthanasie est parfois décidée quand les attentes des propriétaires ne peuvent être satisfaites ou quand la prise en charge de la maladie altère leur quotidien (voir encadré à droite). Ainsi, le principal objectif de la prise en charge du diabète est double :

### Principaux objectifs de la prise en charge

- ❖ Réduire ou supprimer les signes cliniques à l'aide d'un protocole thérapeutique adapté aux contraintes des propriétaires, tout en
- ❖ Prévenant une hypoglycémie insulino-induite ou d'autres complications (acidocétose, par exemple)

Il est parfois difficile d'atteindre ces deux objectifs. Etant donné que l'hypoglycémie peut être dangereuse pour les chats et qu'elle est source d'inquiétude pour les propriétaires,<sup>30</sup> il est préférable, de l'avis du Panel, de mettre l'accent sur la prévention de l'hypoglycémie quitte à autoriser des périodes d'hyperglycémie. Ceci étant dit, chez de nombreux chats, il est possible d'obtenir un bon contrôle de la glycémie en toute sécurité, notamment si les propriétaires réalisent une bonne surveillance à domicile, ce qui peut en retour augmenter les chances de rémission du diabète (voir ci-dessous).

### Contrôle de l'hyperglycémie

Maintenir la glycémie en dessous du seuil rénal (~14 mmol/l [252 mg/dl] chez la majorité des chats)<sup>31</sup> permet de prévenir une diurèse osmotique, peut réduire le risque de glucotoxicité,<sup>32</sup> et devrait limiter les troubles métaboliques associés au diabète, notamment l'acidocétose. En outre, l'insulinothérapie et le contrôle efficace de la glycémie peuvent entraîner une réduction des besoins en insuline endogène et une « mise au repos » des cellules bêta, qui peut augmenter leurs chances de recouvrer leur capacité de sécrétion insulinaire et réduire les effets de la glucotoxicité.

Une rémission diabétique s'observe chez un certain nombre de chats traités, et semble plus fréquente chez les chats mieux contrôlés.<sup>33-36</sup> Un diagnostic précoce (par dépistage régulier des chats obèses et âgés, par exemple), une bonne prise en charge et une bonne SGD (voir plus loin) sont autant d'éléments pouvant aider à améliorer le contrôle de la glycémie et l'évolution clinique à long terme.<sup>33-36</sup>

### Prévention de l'hypoglycémie

L'hypoglycémie correspond à une glycémie < 3,0-3,5 mmol/l (54-63 mg/dl). La valeur la plus basse ne doit être utilisée que lorsque la technique de mesure de la glycémie est fiable et précise (par un laboratoire de référence, par exemple).

Une hypoglycémie légère peut être tolérée par le chat et ne pas être détectée par le propriétaire,

## Préoccupations du propriétaire

Il est important de limiter l'impact négatif potentiel du diabète sur la vie du propriétaire pour éviter un arrêt du traitement ou une euthanasie. Les préoccupations des propriétaires qui ont un impact négatif majeur incluent :<sup>30</sup>

- ❖ Difficultés à mettre un chat diabétique en pension
- ❖ Difficultés à faire garder un chat diabétique par des amis ou de la famille
- ❖ Désir de contrôler davantage le diabète
- ❖ Inquiétude générale à propos du diabète du chat
- ❖ Inquiétude quant à la possibilité d'une hypoglycémie
- ❖ Adaptation de la vie sociale et professionnelle à la maladie
- ❖ Inquiétudes quant aux frais engendrés par le diabète

Le vétérinaire doit adapter le protocole thérapeutique en fonction, par exemple en :

- ❖ Simplifiant le traitement si la vie sociale, la vie professionnelle ou les coûts financiers représentent des problèmes majeurs
- ❖ Utilisant une surveillance de la glycémie à domicile (SGD) si le propriétaire souhaite contrôler davantage le diabète (ce qui peut aussi permettre de réduire les frais d'hospitalisation)
- ❖ Évitant une régulation excessive de l'hyperglycémie et/ou utilisant mieux la SGD si l'hypoglycémie est une préoccupation

Etant donné l'impact négatif de l'hypoglycémie, il est préférable de mettre l'accent sur la prévention de l'hypoglycémie quitte à autoriser des périodes d'hyperglycémie.

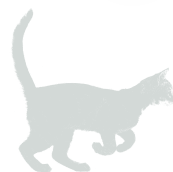

mais une hypoglycémie sévère risque d'engager le pronostic vital et/ou d'entraîner une hyperglycémie réactionnelle.<sup>37</sup> La prévention de l'hypoglycémie par une insulinothérapie minutieuse et une bonne éducation du propriétaire doit donc être une priorité.

### Rôle du régime alimentaire

#### Réduction pondérale chez le chat diabétique en surpoids ou obèse

Stopper l'amaigrissement pathologique associé au diabète constitue le premier objectif de la prise en charge nutritionnelle ; ainsi, les chats diabétiques doivent dans un premier temps être nourris à volonté ou recevoir plusieurs repas par jour. Toutefois, l'obésité s'accompagne d'une insulino-résistance et, chez les chats obèses, une réduction pondérale peut permettre d'améliorer le contrôle de la glycémie et d'augmenter les chances de rémission du diabète.<sup>15,38-40</sup>

Le poids et l'état corporel doivent être évalués régulièrement (toutes les 1 à 2 semaines, par exemple) chez tous les chats diabétiques – par les propriétaires à domicile, ou à la clinique au besoin. La restriction calorique sert à favoriser la perte de poids lors de surcharge pondérale, une fois que la glycémie est à peu près correctement contrôlée. Donner des aliments exclusivement humides peut aider à faire maigrir les chats, car la consommation de boîtes a tendance à entraîner une réduction de la consommation énergétique par rapport aux croquettes.<sup>41</sup> En outre, les rations humides peuvent accroître la consommation hydrique totale,<sup>42-44</sup> ce qui est potentiellement intéressant chez les animaux diabétiques. Il est recommandé, en période de réduction pondérale, de surveiller étroitement la glycémie et les besoins en insuline.

### Choix d'un aliment optimal pour les chats diabétiques

Une restriction glucidique est susceptible d'améliorer la prise en charge du diabète félin. Deux études comparatives randomisées suggèrent un bénéfice potentiel des aliments hypoglycémiques, suite à l'observation de taux de rémission supérieurs<sup>45</sup> et d'un contrôle de la glycémie plus efficace ;<sup>46</sup> notons toutefois qu'il est impossible de ne modifier qu'un seul composant (glucides) de la ration. Bien que la teneur optimale en glucides n'ait pas été déterminée, les aliments à teneur réduite en glucides ( $\leq 12\%$  de l'énergie métabolisable [EM] ou  $3\text{ g}/100\text{ kcal}$ , seuil proposé par la majorité du Panel)<sup>45</sup> sont adaptés, dans l'attente d'autres études. La plupart des aliments humides pour chats et des aliments secs diététiques pour chats formulés pour la prise en charge du diabète sont pauvres en glucides. Les autres aliments pour chats plus riches en glucides (incluant la majorité des aliments secs) ne sont pas recommandés comme aliments de premier choix pour les chats diabétiques.

Les études suggèrent que la quantité ainsi que le type de glucides de la ration sont des facteurs déterminants importants des valeurs d'insulinémie et de glycémie postprandiales chez le chat ; en cas d'hyperglycémie postprandiale, celle-ci pourrait également être prolongée.<sup>47-54</sup> Si les aliments hypoglycémiques formulés pour la prise en charge du diabète constituent donc la meilleure option, il est néanmoins possible de bien contrôler le diabète avec une insulinothérapie et une alimentation plus riche en glucides. Ainsi, d'autres aliments peuvent être utilisés s'ils sont cliniquement indiqués (lors de maladie concomitante, par exemple).<sup>55</sup>

### Mode d'alimentation recommandé pour les chats diabétiques

Le mode d'alimentation optimal pour les chats diabétiques a fait l'objet de peu de recherches.<sup>54</sup> Mais, essentiellement d'après les études menées chez le chat sain avec un régime hypoglycémique (et un contenant des glucides complexes), il semble que les horaires des repas n'aient pas besoin d'être calés sur les injections d'insuline, car le risque d'hyperglycémie postprandiale cliniquement significative est faible. En pratique, comme les variations postprandiales de la glycémie sont imprévisibles, et afin de réduire d'éventuelles hausses de la glycémie liées à l'alimentation, certains vétérinaires préfèrent s'assurer que les chats reçoivent leurs repas au même moment que leurs injections d'insuline ; pour certains propriétaires, il est également plus facile de faire une injection chez un chat en train de manger.

De même, la fréquence des repas n'est pas cruciale – il est généralement conseillé de continuer à nourrir le chat à la même fréquence qu'avant (avec un minimum de deux repas par jour), pour maintenir ses habitudes. Le libre service peut convenir à certains chats, mais la ration quotidienne doit alors être mesurée précisément, surtout chez les chats obèses.

Si la nourriture est retirée (pour la nuit ou avant une anesthésie, par exemple), et en fonction de l'aliment consommé, cela peut n'avoir aucun effet significatif sur la glycémie du matin.<sup>54</sup> Il est toutefois plus sûr d'administrer  $50\%$  de la dose normale d'insuline puis de contrôler ensuite la glycémie, pour rajouter au besoin de l'insuline ou du glucose.

**Tableau 1** Utilisation des hypoglycémisants oraux chez les chats diabétiques – résumé des connaissances actuelles

| Action                                                   | Exemples                                                                                          | Commentaires                                                                                                                                                                                                                                                                                                                                                                                                                                                                                                                                                                                                    |
|----------------------------------------------------------|---------------------------------------------------------------------------------------------------|-----------------------------------------------------------------------------------------------------------------------------------------------------------------------------------------------------------------------------------------------------------------------------------------------------------------------------------------------------------------------------------------------------------------------------------------------------------------------------------------------------------------------------------------------------------------------------------------------------------------|
| Stimulation de la sécrétion pancréatique d'insuline      | <b>Sulfonylurées (sulfamides hypoglycémisants)</b><br>❖ Glipizide<br>❖ Glyburide<br>❖ Glimépiride | Le glipizide oral a été utilisé avec succès chez des chats diabétiques, avec des bénéfices décrits dans plus de $40\%$ des cas, <sup>57-59</sup> mais son application transdermique n'est pas fiable. <sup>60</sup> Les effets indésirables incluent cholestase, hypoglycémie et vomissements. <sup>57,58</sup> Le glimépiride stimule la sécrétion d'insuline chez le chat sain, <sup>61</sup> mais n'a pas encore été évalué chez le chat diabétique. Inquiétude avec tous ces produits : ils pourraient contribuer à la progression de l'amyloïdose pancréatique et de la maladie sous-jacente <sup>62</sup> |
|                                                          | <b>Incrétines</b><br>❖ GLP-1 (glucagon-like peptide 1)<br>❖ DPP-4 (dipeptidyl peptidase-4)        | Le GLP-1 et le DPP-4 augmentent la sécrétion d'insuline chez le chat sain, <sup>63-65</sup> mais n'ont pas encore été évalués chez le chat diabétique                                                                                                                                                                                                                                                                                                                                                                                                                                                           |
| Inhibition de l'absorption intestinale du glucose        | <b>Inhibiteurs de l'alpha-glucosidase</b><br>❖ Acarbose                                           | L'acarbose inhibe la production intestinale de glucose et réduit l'hyperglycémie postprandiale chez les chats sains nourris avec un aliment riche (mais pas pauvre) en glucides. <sup>66</sup> Les seules données publiées chez le chat diabétique proviennent d'une étude non comparative réalisée avec un aliment hypoglycémique <sup>39</sup>                                                                                                                                                                                                                                                                |
| Inhibition de la production hépatique de glucose         | <b>Biguanides</b><br>❖ Metformine                                                                 | La metformine a un intérêt limité chez le chat diabétique. <sup>67</sup> Elle est à proscrire lors de maladie rénale concomitante, et peut entraîner des effets secondaires digestifs dose-dépendants <sup>67,68</sup>                                                                                                                                                                                                                                                                                                                                                                                          |
|                                                          | <b>Glitazones</b><br>❖ Troglitazone<br>❖ Darglitazone<br>❖ Pioglitazone                           | La troglitazone a une biodisponibilité médiocre chez le chat <sup>69</sup> et n'est plus utilisée chez l'homme. La darglitazone et la pioglitazone ont entraîné une amélioration de la sensibilité à l'insuline et du métabolisme lipidique chez des chats obèses, <sup>70,71</sup> mais n'ont pas été évalués chez le chat diabétique                                                                                                                                                                                                                                                                          |
| Amélioration de la sensibilité périphérique à l'insuline | <b>Glitazones</b>                                                                                 | Voir ci-dessus                                                                                                                                                                                                                                                                                                                                                                                                                                                                                                                                                                                                  |
|                                                          | <b>Métaux de transition</b><br>❖ Chrome<br>❖ Vanadium                                             | Une supplémentation en chrome a permis d'améliorer la tolérance au glucose de chats non diabétiques dans une étude, <sup>72</sup> mais pas dans une autre. <sup>73</sup> Dans un petit groupe de chats diabétiques, les chats supplémentés avec du vanadium ont montré des besoins en insuline apparemment réduits. <sup>74</sup> Il est toutefois probable que ces métaux n'aient d'intérêt significatif que chez les chats souffrant d'un déficit en chrome ou en vanadium                                                                                                                                    |

## Rôle des hypoglycémiant oraux

Alors que les hypoglycémiant oraux sont souvent utilisés lors de diabète de type 2 chez l'homme, aucun élément de preuve suffisant ne permet de préférer leur utilisation à celle de l'insulinothérapie chez le chat. Une revue bibliographique récente résume l'état actuel de nos connaissances de ces produits chez le chat (Tableau 1).<sup>56</sup>

### Recommandations concernant l'utilisation des hypoglycémiant oraux

La principale indication des hypoglycémiant oraux est le refus initial de l'insulinothérapie par les propriétaires. Le glipizide est actuellement le seul à bénéficier de suffisamment d'éléments de preuve pour corroborer son utilisation en monothérapie chez le chat. Il est administré à la dose initiale de 2,5 mg PO toutes les 12 heures. En l'absence d'effets indésirables et si un bon contrôle de la glycémie est obtenu après 2 semaines, la dose peut être augmentée à 5 mg toutes les 12 h. Une réponse clinique, s'il en est, est généralement observée après 4 à 6 semaines. (Voir Tableau 1 pour les problèmes potentiels liés à l'utilisation du glipizide.)

Les propriétaires passent souvent à l'insulinothérapie quand le glipizide se révèle inefficace. Cette transition peut généralement s'effectuer sur quelques semaines – une transition précoce étant utile pour éviter de rater la période propice à la suppression des effets toxiques du glucose et pour obtenir une rémission du diabète.

### Choix de l'insuline

Il existe de nombreuses formulations d'insuline disponibles à travers le monde, dont certaines spécifiquement enregistrées chez le chat, qui peuvent être utilisées pour traiter le diabète félin

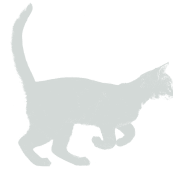

**Bien qu'aucune formulation ne partage la même séquence d'acides aminés que l'insuline féline, la production d'anticorps anti-insuline ne semble pas être un problème clinique important chez le chat.**

de manière sûre et efficace, notamment en association avec une alimentation adaptée. Le choix du vétérinaire reposera sur la disponibilité de l'insuline, l'expérience qu'il en a et les propriétés de l'insuline elle-même. En outre, dans certains pays, la réglementation peut limiter le choix de première intention à certains produits enregistrés chez l'animal.

Les préparations d'insuline disponibles dans le monde et adaptées au traitement long terme du diabète félin se divisent en trois grands groupes (voir encadré ci-dessous). La pharmacocinétique de ces préparations varie en fonction du type d'insuline, de l'individu, et de la formulation pour un même type d'insuline. En outre, la pharmacocinétique varie selon la méthodologie utilisée dans les différentes études. Bien qu'aucune formulation ne partage la même séquence d'acides aminés que l'insuline féline, la production d'anticorps anti-insuline ne semble pas être un problème clinique important chez le chat.<sup>12</sup>

Si dans de nombreuses études de pharmacodynamie menées chez le chat sain, l'insuline glargine et l'insuline détémir ont montré une durée d'action de plus de 24 h,<sup>75,79</sup> d'autres études indiquent que leur durée d'action clinique réelle serait plus proche des 10 à 16 h,<sup>83,84</sup> aucune étude comparative n'a été réalisée avec la PZI. En outre, alors que la courbe de glycémie présente un nadir bien dessiné chez certains chats avec ces analogues insuliniques à action prolongée, cette courbe est plus lissée chez d'autres.<sup>84</sup> L'insuline glargine, l'insuline détémir et la PZI perdurent plus longtemps chez le chat que l'insuline lente,<sup>79,83</sup> et sont donc plus susceptibles d'offrir un meilleur contrôle du diabète en utilisation biquotidienne. De plus, les préparations d'insuline à action prolongée peuvent induire une baisse plus progressive de la glycémie après injection, dans de nombreux cas.

L'utilisation d'insuline à action prolongée, en injections biquotidiennes, est recommandée pour un contrôle optimal du diabète.

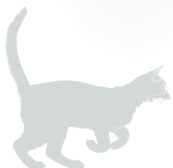

## Types d'insuline et propriétés chez le chat

### Insuline à action intermédiaire

Insuline lente ou suspension d'insuline au zinc ; par exemple, les spécialités vétérinaires Caninsulin/Vetsulin (Merck/MSD Animal Health).

- ❖ Activité maximale habituelle (nadir attendu) chez le chat : 2 à 8 heures après injection
- ❖ Durée d'action habituelle chez le chat : 8 à 10 heures<sup>75-77</sup>

### Insulines à action prolongée

Insuline protamine zinc (PZI) ; par exemple, la spécialité vétérinaire ProZinc (Boehringer Ingelheim)

- ❖ Activité maximale habituelle (nadir attendu) chez le chat : 2 à 6 heures après injection
- ❖ Durée d'action habituelle chez le chat : 13 à 24 heures, bien que peu d'études aient spécifiquement évalué l'insuline recombinante humaine enregistrée en médecine vétérinaire (ProZinc)<sup>78-82</sup>

### Analogues insuliniques à action prolongée

Insuline glargine (Lantus ; Sanofi) et insuline détémir (Levemir ; Novo Nordisk).

- ❖ Activité maximale habituelle (nadir attendu) chez le chat : 12 à 14 heures
- ❖ Durée d'action habituelle chez le chat : 12 heures jusqu'à plus de 24 heures<sup>75,79</sup>

### Préparations et fréquence d'administration recommandées

Bien qu'un bon contrôle du diabète félin puisse être obtenu avec des préparations d'insuline à action intermédiaire et prolongée, et malgré le manque d'études comparatives concluantes chez le chat diabétique, le Panel recommande, d'après nos connaissances actuelles de la pharmacodynamie des préparations d'insuline chez le chat, d'utiliser dans la mesure du possible des préparations d'insuline à action prolongée (glargine, détémir ou PZI, par exemple) en injections biquotidiennes pour un contrôle optimal du diabète.

Un protocole strict d'injections toutes les 12 heures, bien qu'idéal, sera impossible à observer pour de nombreux propriétaires. Une certaine souplesse dans les intervalles d'administration (12 h  $\pm$  2 h) et/ou la suppression pure et simple d'une injection quand des engagements professionnels ou personnels empêchent d'administrer le produit à la bonne heure, sont des compromis acceptables.

L'objectif principal du traitement est de limiter les signes cliniques associés au diabète. Les objectifs plus spécifiques de l'insulinothérapie peuvent être définis ainsi :

#### Objectifs de l'insulinothérapie

- ✦ Maintenir la glycémie < 14 mmol/l (252 mg/dl) le plus longtemps possible sur 24 heures ; et
- ✦ Prévenir une hypoglycémie cliniquement significative tout le temps

Quand un suivi plus intensif est possible, il peut être utile d'essayer de maintenir la glycémie  $\leq$  11 mmol/l (198 mg/dl) pour encore mieux limiter les dérèglements métaboliques associés au diabète et favoriser la rémission<sup>34-36</sup> (voir « Prise en charge intensive du diabète sucré félin » en page 242).

Si le diabète s'avère difficile à contrôler avec les administrations biquotidiennes d'insuline, il faudra envisager d'augmenter la fréquence des administrations et/ou d'utiliser une préparation différente.

De nombreuses préparations d'insuline contiennent 100 U/ml, alors que d'autres (telles que Caninsulin/Vetsulin [Merck/MSD Animal Health] et ProZinc [Boehringer Ingelheim]) sont formulées avec 40 U/ml, ce qui peut être utile pour doser précisément le produit avec les seringues chez le chat. Il est essentiel de s'assurer que les seringues ou stylos à insuline utilisés sont adaptés à la concentration de l'insuline utilisée.

Les fabricants indiquent souvent que les flacons doivent être jetés 4 à 6 semaines après ouverture. Mais il a été suggéré qu'au moins certaines préparations d'insuline peuvent, si elles sont correctement manipulées et conservées au réfrigérateur, être utilisées sans problème pendant 3 à 6 mois.<sup>85</sup> Mais s'écarter des recommandations des fabricants requiert toujours la prudence. Si l'insuline est conservée ou utilisée plus longtemps que recommandé, il faut être très vigilant car le fait de piquer de manière répétée dans les flacons favorise leur contamination et il faut donc conseiller aux propriétaires de jeter l'insuline si elle se décolore ou devient plus trouble.

### Prise en charge initiale du chat diabétique

La dose de départ pour une préparation d'insuline à action intermédiaire ou prolongée chez un chat non cétosique est généralement la suivante :

#### Dose de départ : 0,25–0,5 U/kg toutes les 12 h

- ✦ La dose est arrondie à l'unité inférieure et elle est généralement  $\leq$  2 U/chat toutes les 12 h
- ✦ La dose supérieure de 0,5 U/kg peut convenir si la glycémie est > 20 mmol/l (360 mg/dl)
- ✦ Pour les chats obèses ou en sous-poids, la dose doit être calculée en fonction du poids idéal estimé, et non du poids actuel

Parce que l'hyperglycémie elle-même est une cause d'insulinorésistance et de dysfonctionnement des cellules bêta, un traitement efficace peut faire baisser les besoins en insuline après un délai variable. Le suivi précoce de la glycémie vise donc principalement à détecter toute hypoglycémie, qui pourrait nécessiter une réduction de la dose d'insuline. Les augmentations de doses d'insuline (si nécessaire) doivent reposer sur la persistance de signes cliniques et de l'hyperglycémie, évaluée par estimations répétées de la glycémie (à domicile ou à la clinique) à partir de 5 à 7 jours environ après le début du traitement.

Les doses ne doivent généralement pas être augmentées plus souvent que tous les 5 à 7 jours. Une augmentation trop rapide des doses est une cause fréquente d'hypoglycémie, d'hyperglycémie de rebond et de mauvais contrôle du diabète.

#### Seringues et stylos à insuline

La dose d'insuline administrée à la plupart des chats diabétiques est faible. Il est donc préférable d'utiliser une préparation d'insuline contenant 40 U/ml (plutôt que 100 U/ml) ainsi qu'une seringue à insuline graduée correspondant.<sup>86</sup> Les préparations d'insuline ne doivent pas être diluées pour faciliter le dosage des petits volumes, car cela interfère avec leurs propriétés physicochimiques.

Un stylo à insuline (VetPen ; Merck/MSD Animal Health) est disponible sur le marché vétérinaire (Figure 1). Ce dispositif pourrait permettre

d'améliorer la reproductibilité et la précision des administrations d'insuline (notamment pour les petites doses),<sup>87</sup> et de nombreux propriétaires trouvent qu'un stylo à insuline est plus facile à utiliser qu'une seringue et une aiguille.

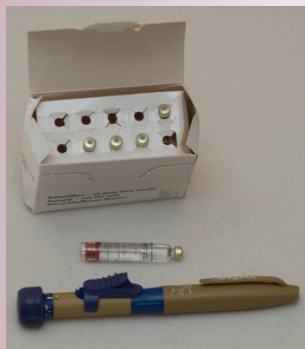

Figure 1 L'utilisation d'un stylo à insuline pourrait améliorer la précision du dosage de l'insuline

**Les préparations d'insuline ne doivent pas être diluées pour en faciliter le dosage.**

La majorité des cas de diabète non compliqué (bon état général, pas d'acidocétose ou d'autres complications majeures) sont initialement mieux pris en charge à domicile, avec une insulinothérapie et un régime alimentaire adapté. Certains vétérinaires et propriétaires préfèrent que le chat soit traité à la clinique pendant les premiers jours, pour être sûrs qu'une hypoglycémie sévère ne se développe pas et pour évaluer la réponse initiale à l'insuline. Toutefois, les propriétaires doivent être informés que l'animal ne sera pas stabilisé en seulement quelques jours.

Pour préparer la sortie d'hospitalisation du chat, il est nécessaire d'enseigner au propriétaire les aspects techniques du traitement d'un chat diabétique. Cela inclut des instructions détaillées et des démonstrations concernant :

- ❖ Le passage à un aliment et à un mode d'alimentation optimaux.
- ❖ L'utilisation des seringues et/ou stylos à insuline.
- ❖ Les bonnes techniques de manipulation, de conservation et d'injection de l'insuline.
- ❖ Les signes cliniques de l'hypoglycémie, et le traitement pour y remédier.

Les instructions écrites sont précieuses pour le propriétaire. D'autres informations à destination des propriétaires sont également disponibles sur internet (voir page 247).

### Stabilisation à domicile (en ambulatoire) du chat diabétique

Les recommandations suivantes sont proposées, mais certaines varient selon le type d'insuline utilisée comme indiqué.

#### 5-10 jours après la sortie d'hospitalisation

- ❖ Le chat doit être réexaminé à la clinique, soit après avoir reçu son repas et sa dose insuline à domicile, soit avant l'heure prévue de l'injection d'insuline si le chat mange bien quand il est hospitalisé.
- ❖ Un examen clinique approfondi doit être réalisé, la réponse clinique de l'animal à domicile doit être évaluée en détail (consommation hydrique quotidienne, glycosurie...) et les paramètres de laboratoire sont réévalués au besoin.
- ❖ Une courbe de glycémie doit être tracée le cas échéant et dans la mesure du possible (voir encadré en page 242). Idéalement, la glycémie est mesurée toutes les 1 à 2 heures (pour l'insuline lente) ou toutes les 2-3 heures (pour les préparations à action prolongée) pendant au moins 12 heures, en gardant à l'esprit que la glycémie peut varier d'un jour à l'autre chez un même individu.
- ❖ Les chats étant prédisposés à l'hyperglycémie de stress, l'exactitude des valeurs de glycémie issues des courbes réalisées à la clinique peut être contestable. Le dosage de la fructosamine sérique et/ou la SGD (voir plus loin) peuvent donc être utiles.

**Tableau 2** Glycémie et modifications possibles de la posologie d'insuline après les 5-10 premiers jours de traitement

| Glycémie                                                                                               | Action                                                                                                                                                                                                                                                                                                                          |
|--------------------------------------------------------------------------------------------------------|---------------------------------------------------------------------------------------------------------------------------------------------------------------------------------------------------------------------------------------------------------------------------------------------------------------------------------|
| Nadir < 4,5 mmol/l (80 mg/dl)                                                                          | <ul style="list-style-type: none"> <li>❖ Réduire la dose d'insuline de 50 %</li> <li>❖ Envisager d'utiliser une insuline à action plus longue si le pic de glycémie &gt; 14 mmol/l (252 mg/dl)</li> </ul>                                                                                                                       |
| Glycémie entre 4,5 et 14 mmol/l (80-252 mg/dl) sur toutes les mesures de la journée                    | Maintenir le traitement                                                                                                                                                                                                                                                                                                         |
| Pic de glycémie > 14 mmol/l (252 mg/dl) et nadir entre 4,5 et 8,0 mmol/l (80-144 mg/dl)                | <ul style="list-style-type: none"> <li>❖ Maintenir le traitement et réévaluer après 1 à 2 semaines ; ou</li> <li>❖ Changer d'insuline (si insuline lente utilisée) pour une insuline à action prolongée ; ou</li> <li>❖ Augmenter la dose de 0,5 U/chat toutes les 12 h (en fonction du pic et du nadir de glycémie)</li> </ul> |
| Pic de glycémie > 14 mmol/l (252 mg/dl) et nadir > 8,0 mmol/l (144 mg/dl), avec signes d'hyperglycémie | Augmenter la dose de 0,5-1,0 U/chat toutes les 12 h                                                                                                                                                                                                                                                                             |

- ❖ Certaines cliniques utilisent un système de mesure de glycémie en continu (MGC) pour évaluer la réponse à l'insuline (Figure 2) – cela peut permettre de réduire le risque d'hyperglycémie de stress induite par les prélèvements répétés, de détecter de courtes périodes d'hypoglycémie et de faciliter le suivi nocturne de la glycémie.<sup>88</sup> Ces systèmes de MGC peuvent également être utilisés à domicile, mais les propriétaires doivent être capables de prélever du sang chez leur chat pour calibrer l'appareil. L'arrière du cou pourrait être l'endroit le plus adapté pour placer le capteur.<sup>89</sup>
- ❖ La dose d'insuline est ajustée en fonction des résultats du suivi clinique, des données de glycémie et des signes cliniques (Tableau 2).

#### Trois semaines après la sortie d'hospitalisation (en fonction de la réponse précédente)

- ❖ Le chat est réévalué comme précédemment, avec une courbe de glycémie réalisée à domicile ou à la clinique.
- ❖ Une SGD doit, le cas échéant et dans la mesure du possible, être discutée avec le propriétaire et le matériel nécessaire fourni.

#### Surveillance de la glycémie à domicile (SGD)

Le Panel encourage le recours à la SGD, car elle aide à mieux contrôler la maladie, à détecter une hypoglycémie et peut permettre d'améliorer le contrôle de la glycémie.<sup>90,91</sup> Bien que la SGD ne soit pas à la portée de tous les propriétaires,<sup>91</sup> elle peut être efficacement réalisée par la majorité d'entre eux, avec un soutien suffisant, et doit idéalement être mise en place de manière précoce dans la prise en charge du diabète. Les propriétaires doivent pouvoir accéder facilement à une assistance (du vétérinaire et/ou de l'ASV) en cas de besoin.<sup>92,93</sup>

Une ASV expérimentée ou un vétérinaire doit leur apprendre, lors d'une consultation prolongée,

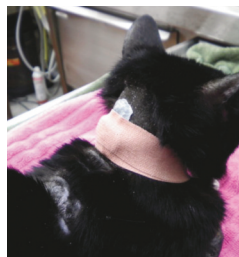

**Figure 2** Chat diabétique équipé d'un contrôleur de glycémie en continu

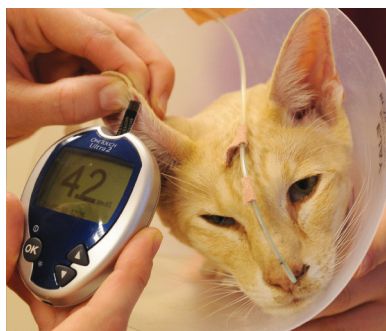

**Figure 3** Contrôle de la glycémie à la veine marginale de l'oreille – technique utilisée à domicile par les propriétaires

## Utilisation des courbes de glycémie

Les courbes de glycémie peuvent être très utiles pour évaluer le diabète sucré félin (Figures 4 et 5), même si elles ont leurs limites et que leurs valeurs peuvent varier considérablement d'un jour à l'autre, notamment si la glycémie est mal contrôlée.<sup>96</sup> Par rapport aux courbes réalisées à domicile, celles réalisées à la clinique peuvent soit sous-estimer soit surestimer le contrôle de la glycémie (Figure 4), peut-être en raison des variations quotidiennes naturelles mais aussi de l'influence du stress, des variations des doses d'insuline et éventuellement de celles de la consommation alimentaire.<sup>92</sup> Les courbes à la clinique doivent donc être interprétées avec beaucoup de prudence et à la lumière des données cliniques.

Les courbes initiales doivent davantage servir à identifier une hypoglycémie qu'à affiner le traitement du diabète. Il n'est pas forcément nécessaire de réaliser une courbe sur 12 heures à chaque réévaluation, car cela n'apporte pas toujours d'informations

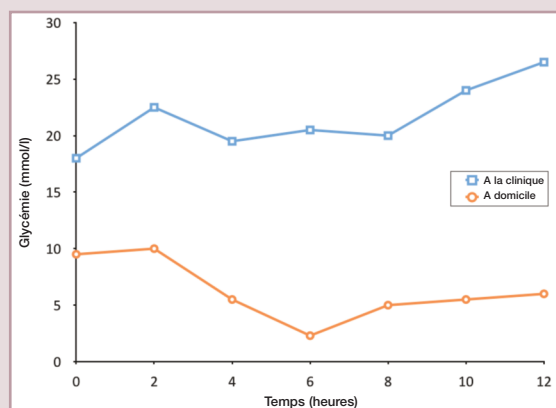

**Par rapport aux courbes de glycémie à domicile, les courbes réalisées à la clinique peuvent sur- ou sous-estimer le contrôle de la glycémie.**

utiles supplémentaires (par exemple, quand il existe des signes cliniques de type PUPD indiquant que la glycémie est toujours élevée).

Le nadir de la courbe, la durée d'action de l'insuline et la glycémie avant injection sont les paramètres les plus importants à prendre en compte pour ajuster la dose d'insuline. Prélever du sang toutes les 2–3 heures (pour les insulines à action prolongée) suffit généralement, mais des prélèvements toutes les heures peuvent être indiqués cas de suspicion d'hypoglycémie. Chez certains chats, pour lesquels on connaît et on peut prédire les réponses aux préparations d'insuline à action prolongée, il pourrait être possible d'évaluer la glycémie toutes les 4 heures seulement.

Une courbe de glycémie idéale a la forme d'une assiette creuse, mais il n'est pas toujours possible de l'obtenir. La valeur maximale ne doit idéalement pas dépasser 14 mmol/l (252 mg/dl) et le nadir ne doit pas généralement pas être inférieur à 4,5 mmol/l (80 mg/dl).

**Figure 4** Courbes de glycémie réalisées chez un même chat à domicile (cercles) et à la clinique (carrés) à 3 jours d'intervalle (2 unités d'insuline glargine étant injectées à chaque fois à t = 0). Le chat (un mâle castré européen de 9 ans pesant 4,9 kg) avait été diagnostiqué diabétique 3 semaines auparavant et était sous régime hyperprotéique et hypoglycémique. Les signes cliniques étaient bien contrôlés et les concentrations sériques de fructosamine avaient baissé de 200  $\mu$ mol/l. Les deux courbes diffèrent fortement l'une de l'autre. Les valeurs de glycémie de la courbe réalisée à la clinique étaient nettement supérieures à celles de la courbe réalisée à domicile, et étaient toutes au-dessus des valeurs cibles. La majorité des valeurs de la courbe à domicile étaient dans les valeurs cibles, malgré un nadir trop bas (2,3 mmol/l). Les valeurs élevées de glycémie observées à la clinique ont été attribuées au stress. En raison du faible nadir observé à domicile, la dose d'insuline a été légèrement réduite et le chat a continué à bien se porter, ce qui montre que la glycémie mesurée à la clinique pouvait être altérée par le stress. Ne pas reconnaître l'effet du stress sur la glycémie peut faire supposer à tort que le diabète est mal contrôlé. La surveillance à domicile est donc la méthode de choix pour évaluer l'état de la glycémie

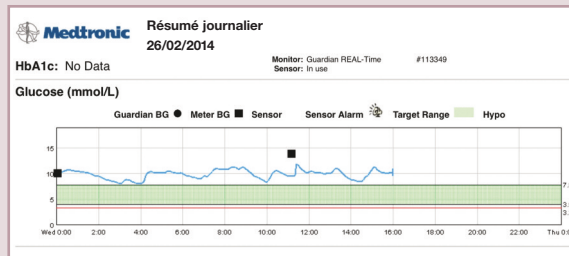

**Figure 5** Exemple de courbe de glycémie réalisée avec un contrôleur de glycémie en continu

à prélever du sang au niveau des capillaires ou à la veine marginale de l'oreille à l'aide d'une lancette et à utiliser un glucomètre portatif validé chez le chat (Figure 3). Le sang peut être prélevé indifféremment à l'oreille ou aux coussinets métacarpiens ou métatarsiens, et cette procédure est bien tolérée par la plupart des chats.<sup>94,95</sup> Des documents papier ou des références en ligne doivent être fournies aux propriétaires (voir page 247).

Une courbe de glycémie peut être réalisée à domicile en mesurant la glycémie avant l'injection d'insuline du matin, puis toutes les 2–3 heures pendant 12 heures (ou toutes les heures en cas de suspicion d'hypoglycémie). Il faut toutefois conseiller aux propriétaires de ne pas prendre de décisions concernant la dose d'insuline sans en discuter avec leur vétérinaire.

### Prise en charge intensive du diabète sucré félin

Une prise en charge intensive du diabète a été décrite et inclut une SGD régulière (avec un

### Glucomètres

La glycémie se mesure idéalement à l'aide d'un glucomètre vétérinaire validé chez le chat (AlphaTRAK 2 ; Abbott Animal Health, par exemple).<sup>97</sup> Les glucomètres conçus pour un usage humain donnent souvent des résultats faussement bas chez le chat (ou faussement élevés pour certains glucomètres), bien que les différences soient souvent dans des limites cliniquement acceptables.<sup>94,98–100</sup>

minimum de 3 et une moyenne de 5 mesures de la glycémie par jour, généralement) et des ajustements adaptés de la posologie d'insuline,<sup>35,36,85</sup> dans l'objectif de maintenir un contrôle étroit de la glycémie pour que la celle-ci reste le plus près possible des normes physiologiques.

Deux petites études réalisées avec des injections biquotidiennes de glargine chez des chats diabétiques ont montré qu'un contrôle plus étroit de la glycémie pourrait être plus à même d'entraîner une rémission du diabète.<sup>33,34</sup> Il existe aussi des preuves que les analogues de l'insuline à action prolongée (glargine et détémir) pourraient être moins susceptibles d'induire une hypoglycémie clinique lors de contrôle étroit de la glycémie,<sup>33,34,101</sup> malgré le manque d'études comparatives de qualité.

Les études impliquant une prise en charge intensive du diabète recommandent souvent de viser une glycémie entre un plancher de 2,8–3,0 mmol/l (50–54 mg/dl) et un plafond de 5,5–11,1 mmol/l (99–200 mg/dl) sur une période entière de 24 heures.<sup>34–36,85</sup>



Toutefois, le Panel pense que :

- ❖ Mesurer la glycémie plusieurs fois par jour n'est pas gérable pour la majorité des propriétaires de chats diabétiques.

- ❖ Il n'est pas réaliste, pour la majorité des propriétaires, d'adopter de manière sûre une approche aussi stricte et un contrôle aussi étroit de la glycémie.

- ❖ Si le suivi étroit du diabète peut permettre d'atteindre l'objectif d'abaisser les pics de glycémie ( $\leq 11$  mmol/l [198 mg/dl]), il faut toutefois éviter de viser un nadir  $< 4,5$  mmol/l (81 mg/dl) tant qu'il n'est pas prouvé (par des études cliniques comparatives randomisées) que cela entraîne un net bénéfice clinique.

## Prise en charge à long terme du chat diabétique

### Suivi à domicile

Les informations fournies par le propriétaire du chat sont très utiles pour évaluer le contrôle du diabète,<sup>102</sup> et s'avèrent particulièrement importantes en cas d'impossibilité de suivi répété de la glycémie (pour des raisons financières, par exemple). Il faut inciter les propriétaires à tenir un journal (Figure 6) où ils enregistrent les informations suivantes :

- ❖ **Bien-être global du chat** En particulier son comportement et son niveau d'activité.

- ❖ **Consommation hydrique journalière** La glycémie moyenne est corrélée à la consommation hydrique sur 24 heures<sup>102</sup> et l'amélioration (réduction) de la consommation hydrique est un bon marqueur clinique de la réponse à l'insulinothérapie.<sup>6,81,102</sup> La consommation hydrique journalière varie entre les individus, et est également influencée par de nombreux facteurs alimentaires et environnementaux,<sup>43,44,103-108</sup> outre des facteurs pathologiques. En général, les chats sous alimentation humide ont une consommation hydrique totale supérieure à ceux sous alimentation sèche, bien que la quantité d'eau qu'ils consomment volontairement (en dehors de l'eau ingérée avec l'aliment) puisse être inférieure.<sup>42-44</sup> C'est pour cette raison qu'il est impossible d'établir une consommation hydrique volontaire journalière cible chez les chats diabétiques. Les propriétaires peuvent évaluer subjectivement la consommation hydrique, mais un suivi précis de la consommation hydrique journalière est utile (à l'aide d'un bol gradué tous les 10 ml pour mesurer l'eau absorbée, par exemple). Si le bol gradué est utilisé par plusieurs chats, la quantité totale d'eau bue par tous les chats peut être mesurée. Si la consommation hydrique ne diminue pas, ou si elle augmente après avoir diminué, une réévaluation du contrôle de la glycémie sera indiquée.

- ❖ **Production urinaire journalière** L'évaluation peut être subjective (quantité d'urine présente dans le bac à litière, taille/ nombre d'agglomérats de litière imbibée d'urine) ou objective (poids

| Date  | Time | Insulin Injection | Meal            | Meal Amount fed over the day | Behaviour and energy level | Urine glucose | Urine ketones | Body weight (kg) | Water intake (ml/d) | Other notes   |
|-------|------|-------------------|-----------------|------------------------------|----------------------------|---------------|---------------|------------------|---------------------|---------------|
| 21/04 | 7/7  | 4/4               | 3/16 comp / wet | all                          | N                          | 31.9          | 31.0          | 300ml            |                     |               |
| 22/04 | 7/7  | 4/4               | "               | "                            | N                          | —             | 24.6          | 200ml            |                     |               |
| 23/04 | 7/7  | 4/4               | light dry       | all                          | QUIET                      | 23.9          | 26.2          | 200ml            |                     |               |
| 24/04 | 7/7  | 4/5               | "               | "                            | QUIET                      | 28.6          | 32.7          | 150ml            |                     |               |
| 25/04 | 7/7  | 4/5               | mo 3/16 comp    | "                            | N                          | 26.8          | 32.3          | 400ml            |                     |               |
| 26/04 | 7/7  | 3/4               | "               | "                            | N                          | —             | 21.3          | 200ml            |                     |               |
| 27/04 | 7/7  | 5/4               | "               | "                            | N                          | 35.7          | 25.7          | —                |                     |               |
| 28/04 | 7/7  | 4/5               | "               | "                            | N                          | 31.0          | 30.0          | —                |                     |               |
| 29/04 | 7/7  | 3/5               | "               | "                            | N                          | 14.7          | HI            | 300ml            |                     |               |
| 30/04 | 7/7  | 4/3               | "               | "                            | N                          | 28.4          | 16.8          | 400ml            |                     | Appetite down |
| 01/05 | 7/7  | 4/3               | "               | "                            | N                          | 24.6          | 20.0          | 300ml            |                     |               |
| 02/05 | 7/7  | 3/4               | "               | "                            | N                          | —             | 22.9          | —                |                     |               |
| 03/05 | 7/7  | 4/4               | "               | "                            | N                          | 22.8          | 29.3          | 300ml            |                     |               |
| 04/05 | 7/7  | 4/5               | "               | "                            | N                          | 16.1          | 32.3          | 200ml            |                     |               |
| 05/05 | 7/7  | 4/3               | "               | "                            | N                          | 24.0          | 14.8          | 5.1kg            | 250ml               |               |
| 06/05 | 7/7  | 5/5               | "               | "                            | N                          | 21.0          | 37.6          | 700ml            |                     | Appetite down |
| 07/05 | 7/7  | 3/4               | "               | "                            | N                          | 19.0          | 32.8          | 300ml            |                     |               |
| 08/05 | 7/7  | 3/4               | "               | "                            | N                          | 19.0          | 36.6          | 350ml            |                     |               |
| 09/05 | 7/7  | 4/4               | "               | "                            | N                          | 20.3          | 25.9          | —                |                     |               |
| 10/05 | 7/7  | 4/4               | "               | "                            | N                          | 27.2          | 24.6          | —                |                     | Hungry        |
| 11/05 | 7/7  | 4/4               | "               | "                            | N                          | 32.9          | 29.8          | 450ml            |                     | Appetite down |
| 12/05 | 7/7  | 3/4               | "               | "                            | N                          | 10.7          | 39.0          | 300ml            |                     | Appetite down |

Figure 6 Exemple d'un journal de suivi du diabète chez le chat

Le Panel encourage la surveillance de la glycémie à domicile, car elle aide à détecter toute hypoglycémie et peut permettre d'améliorer le contrôle de la glycémie.

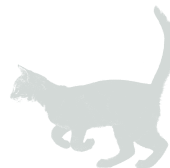

du bac à litière avant et après miction).

- ❖ **Alimentation journalière** Quantité et type d'aliment proposé, et quantité consommée.

- ❖ **Administration d'insuline journalière** Heure d'administration et dose.

- ❖ **Poids et score d'état corporel hebdomadaires** En utilisant des balances précises pour la pesée (au besoin, venir à la clinique).

- ❖ **Glycosurie** Le dépistage du glucose dans l'urine peut être particulièrement utile quand les propriétaires ne peuvent pas réaliser une SGD. L'urine peut être recueillie sur une journée entière par semaine et les propriétaires peuvent utiliser une bandelette urinaire pour tester un mélange d'urine (récupéré dans un bac rempli de litière non absorbante ou perforé dans le fond) ou de la litière imbibée d'urine. Il faut être prudent dans l'interprétation des résultats et conseiller aux propriétaires de ne pas modifier la dose d'insuline en fonction sans en avoir discuté avec leur vétérinaire. Toutefois, une glycosurie persistante suggère un contrôle insuffisant, alors qu'une absence persistante de glucose peut traduire aussi bien un excellent contrôle de la glycémie qu'une rémission du diabète ou qu'un surdosage d'insuline, et une évaluation plus poussée sera alors nécessaire. La présence de corps cétoniques doit également être évaluée (un résultat positif suggère un mauvais contrôle de la glycémie).

- ❖ **Glycémie** Quand une bonne SGD est possible, les mesures suivantes sont idéalement réalisées et enregistrées dans le journal :

- Courbes de glycémie : Toutes les semaines jusqu'à stabilisation puis toutes les 3-4 semaines.
- Mesure ponctuelle de la glycémie : Si le propriétaire s'inquiète à propos du bien-être du chat.

Si le propriétaire souhaite une prise en charge intensive du diabète (voir plus haut), plusieurs mesures quotidiennes de la glycémie peuvent être effectuées.

Quand une SGD *moins fréquente* est possible, les mesures suivantes sont idéalement réalisées et enregistrées dans le journal :

- Courbes de glycémie moins fréquentes : Par exemple, toutes les 2 à 6 semaines ; et/ou
- Mesure ponctuelle de la glycémie : Si le propriétaire s'inquiète à tout moment ; et/ou

– Mesure de la glycémie avant l'administration d'insuline aussi souvent que possible.

Ensemble, certaines ou la totalité de ces mesures peuvent être utiles pour les propriétaires qui trouvent difficile ou stressant de réaliser des courbes de glycémie répétées. Si la glycémie est mesurée avant l'administration d'insuline, il est possible de sauter l'administration ou de réduire la dose d'insuline injectée quand le résultat est bas, pour aider à prévenir une hypoglycémie. Encore une fois, il faut conseiller aux propriétaires de ne pas modifier la dose d'insuline sans en avoir discuté avec leur vétérinaire.

### Suivi à la clinique

Des réévaluations fréquentes sont nécessaires au début pour ajuster progressivement la dose d'insuline, pour détecter une rémission du diabète et pour identifier les chats difficiles à stabiliser qui nécessitent un travail supplémentaire. La fréquence des visites à la clinique dépendra principalement de la réponse au traitement et de la capacité du propriétaire à réaliser une SGD.

Pour le suivi à la clinique, il serait indiqué d'évaluer l'animal au bout d'une puis 2 à 3, 6 à 8, 10 à 12 et 14 à 16 semaines après le début du traitement. La fréquence des réévaluations ultérieures peut généralement être réduite à environ une visite tous les 1 à 4 mois en fonction de la stabilité du chat et de la capacité/méticulosité du propriétaire à effectuer le suivi à domicile. Si une rémission du diabète semble probable, des vérifications plus fréquentes peuvent être judicieuses.

Chaque réévaluation variera en fonction des besoins cliniques mais pourra inclure :

- ❖ Révision du journal de suivi du diabète (voir plus haut).
- ❖ Pesée et évaluation de l'état corporel.
- ❖ Examen clinique.
- ❖ Réalisation d'une courbe de glycémie à la clinique (par exemple, après que le propriétaire a administré l'insuline et nourri son chat à domicile) ; cela peut être souhaitable si une SGD n'est pas régulièrement effectuée..
- ❖ Dosage de la fructosamine sérique (voir page 245).

**Les ajustements successifs de posologie doivent être espacés d'au moins 5 à 7 jours, sauf en cas d'hypoglycémie, pour laisser le temps à l'organisme de s'équilibrer avec la nouvelle dose d'insuline.**

### Ajustement de l'insulinothérapie

Les signes cliniques et les mesures de la glycémie (à domicile ou à la clinique, en tenant compte de leurs limites) sont les paramètres les plus importants à considérer pour ajuster la posologie d'insuline.<sup>102</sup> Si les signes cliniques, tels que la PUPD, ont rétrogradé et que le poids est stable, cela signifie généralement que les chats sont bien contrôlés (bien que certains puissent être surdosés). À l'inverse, des signes cliniques persistants et une perte de poids suggèrent un mauvais contrôle de la glycémie et/ou une maladie concomitante.

En cas de discordance entre les signes cliniques et les résultats d'une courbe de glycémie, les décisions thérapeutiques doivent rester prudentes – les concentrations de fructosamine doivent être réévaluées, et une nouvelle courbe de glycémie peut être réalisée quelques jours après, avant de décider de modifier le traitement.

Pendant les 3–4 premiers mois de traitement, c'est au vétérinaire d'interpréter les courbes de glycémie et de prendre les décisions concernant les ajustements du traitement (Tableau 3). Mais pour la prise en charge à long terme, les propriétaires peuvent, avec le soutien de l'équipe soignante vétérinaire, acquérir suffisamment d'expérience pour effectuer eux-mêmes des ajustements (légers) du traitement, conformément aux recommandations écrites. Les ajustements successifs de posologie doivent être espacés d'au moins 5 à 7 jours, sauf en cas d'hypoglycémie, pour laisser le temps à l'organisme de s'équilibrer avec la nouvelle dose d'insuline.

**La majorité des chats nécessitent à terme des doses d'insuline comprises entre 0,5 et 6,0 U/chat toutes les 12 heures pour contrôler leur diabète.**

**Tableau 3** Propositions d'ajustement de la posologie d'insuline en fonction de la glycémie pour la prise en charge à long terme des chats diabétiques

| Glycémie                                                       | Ajustement de la posologie d'insuline                                                                                                                                                                                                              |
|----------------------------------------------------------------|----------------------------------------------------------------------------------------------------------------------------------------------------------------------------------------------------------------------------------------------------|
| Nadir < 4,5 mmol/l (80 mg/dl)                                  | <ul style="list-style-type: none"> <li>❖ Réduire la dose d'insuline de 0,5–1,0 U/chat toutes les 12 heures si la dose actuelle est de 0,5–3,0 U/chat toutes les 12 h</li> <li>❖ Réduire de 25 à 50 % si la dose actuelle est supérieure</li> </ul> |
| Nadir > 8,0 mmol/l (144 mg/dl)                                 | Augmenter la dose d'insuline de 0,5–1,0 U/chat toutes les 12 h                                                                                                                                                                                     |
| Glycémie avant insuline entre 8 et 10 mmol/l (144–180 mg/dl)   | Envisager de réduire la dose d'insuline de 0,5 U/chat toutes les 12 h                                                                                                                                                                              |
| Glycémie avant insuline entre 4,5 et 7,9 mmol/l (80–142 mg/dl) | Réduire la dose d'insuline d'au moins 0,5 U/chat toutes les 12 h                                                                                                                                                                                   |
| Glycémie avant insuline < 4,5 mmol/l (80 mg/dl)                | Suspendre l'insuline ; si la glycémie augmente ensuite significativement, donner environ 30–50 % de la dose antérieure                                                                                                                             |

Remarque : Pour l'ajustement des doses d'insuline, il est également intéressant d'évaluer l'ensemble de la courbe de glycémie. La forme de la courbe et le temps au nadir peuvent varier selon les individus et ces informations, quand elles sont disponibles, peuvent influencer les décisions d'ajustement des doses, l'objectif étant de maintenir la glycémie entre un maximum de 10–14 mmol/l (144–252 mg/dl) et un minimum de 4,5–8 mmol/l (80–144 mg/dl). Avec la glargine et le détémir par exemple, le nadir peut coïncider avec l'administration d'insuline chez certains chats.

## Dosage de la fructosamine

**Les concentrations de fructosamine chez le chat reflètent la glycémie moyenne de la semaine précédente environ.**

Les normes de fructosamine diffèrent quelque peu selon les laboratoires et les méthodologies, mais se situent généralement autour de 200–360  $\mu\text{mol/l}$ . Chez le chat, les concentrations de fructosamine reflètent la glycémie moyenne de la semaine précédente environ,<sup>26</sup> et sont un bon indicateur du contrôle de la glycémie lors de diabète.<sup>23,27,77,80,81,102,109–111</sup> Mais ces concentrations peuvent également varier selon les individus, et potentiellement avec l'âge, le sexe, la protéinémie, l'état d'hydratation, l'équilibre acido-basique, la fonction thyroïdienne et les

maladies susceptibles d'altérer le renouvellement protéique.<sup>26,28,112,113</sup>

Il est probablement extrêmement utile d'évaluer les variations dans le temps des concentrations de fructosamine chez chaque animal, mais le Tableau 4 ne fournit des recommandations que pour l'interprétation des concentrations absolues de fructosamine. Notons que, comme nous l'avons déjà mentionné, les taux de fructosamine peuvent ne pas être augmentés chez les chats souffrant de diabète récent et/ou modéré.

**Tableau 4** Recommandations pour l'interprétation des concentrations de fructosamine chez le chat diabétique

| Concentration de fructosamine | Interprétation générale concernant le contrôle de la glycémie                     |
|-------------------------------|-----------------------------------------------------------------------------------|
| < 350 $\mu\text{mol/l}$       | Excellent contrôle de la glycémie ou surdosage d'insuline ou rémission du diabète |
| 350–450 $\mu\text{mol/l}$     | Bon contrôle de la glycémie                                                       |
| 450–550 $\mu\text{mol/l}$     | Contrôle modéré de la glycémie                                                    |
| > 550 $\mu\text{mol/l}$       | Mauvais contrôle de la glycémie                                                   |

### Principal objectif du traitement

Maintenir la glycémie entre un pic de 10–14 mmol/l (180–252 mg/dl) et un nadir de 4,5–8,0 mmol/l (80–144 mg/dl)

Le principal objectif du traitement est défini ci-dessus. Notons que :

- ❖ Pendant la stabilisation initiale, la dose d'insuline doit être progressivement augmentée par paliers de 0,5–1,0 U/chat toutes les 12 h jusqu'à ce que le nadir se situe entre 4,5 et 8,0 mmol/l (80–144 mg/dl).
- ❖ Si le nadir se situe dans l'intervalle désiré – mais que la durée d'action de l'insuline est toujours inférieure à 8–10 h et qu'il existe des signes cliniques d'un contrôle insuffisant de la glycémie – le chat doit être passé à une préparation d'insuline à action plus longue.
- ❖ Idéalement, une courbe de glycémie doit être réalisée 5 à 7 jours après tout ajustement de la dose d'insuline ou tout changement de préparation d'insuline. Mais il faudra en réaliser une avant (après 1 à 3 jours) en cas de risque accru d'hypoglycémie (nadir < 4,5 mmol/l [80 mg/dl] ou glycémie avant insuline < 8 mmol/l [144 mg/dl], par exemple).
- ❖ Lorsqu'il n'est pas possible de réaliser des courbes de glycémie, les ajustements de dose d'insuline doivent être effectués avec la plus grande prudence. La dose doit être augmentée par petits paliers (0,5 U/chat toutes les 12 h) espacés d'au moins 7 jours jusqu'à ce que les signes cliniques rétrocedent et que la glycosurie disparaisse ou qu'il n'en reste que des traces. Des dosages répétés de la fructosamine doivent également être réalisés (voir encadré ci-dessus).

La majorité des cas nécessiteront à terme des doses d'insuline comprises entre 0,5 et 6,0 U/chat toutes les 12 h pour contrôler leur diabète ; si la dose est > 1,5 U/chat toutes les 12 h, il faudra envisager d'explorer les causes d'insulinorésistance.

**Si pendant 2 à 4 semaines sans insuline, la glycosurie reste négative et/ou l'euglycémie se maintient, il est probable que le chat soit en rémission.**

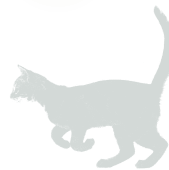

### Rémission du diabète

Une rémission du diabète n'est pas forcément facile à détecter ni à gérer. Si l'urine reste négative en glucose, que toutes les mesures de la glycémie sont des les normes (<~7,5 mmol/l [135 mg/dl]) et/ou que la fructosamine sérique est < 350  $\mu\text{mol/l}$ , la dose d'insuline devra généralement être réduite de 0,25 à 1,0 U/chat toutes les 12 h une fois toutes les 1 à 2 semaines. En cas de valeurs de glycémie basses ou normales-basses, une réduction plus rapide de la dose (ou un arrêt temporaire de l'insulinothérapie) pourra être nécessaire.

Quand une dose journalière de 0,5 U/chat (0,5 U/chat toutes les 24 h ou 0,25 U/chat toutes les 12 h) est atteinte et que la glycémie reste normale, l'insulinothérapie doit être arrêtée. Si pendant 2 à 4 semaines sans insuline, la glycosurie reste négative et/ou l'euglycémie se maintient, il est probable que le chat soit en rémission.

S'il n'est pas possible de mesurer la glycémie et qu'une rémission est suspectée chez un chat bien régulé et non glycosurique, la dose d'insuline pourra être progressivement réduite (de 0,5–1,0 U/chat toutes les 12 h une fois toutes les 1 à 2 semaines), soit jusqu'à ce que les signes cliniques ou la glycosurie réapparaissent, soit jusqu'à ce que l'insuline puisse être arrêtée.

Les chats en rémission doivent rester sous alimentation hypoglycémique et doivent être étroitement surveillés pour voir si les signes cliniques réapparaissent. Des mesures régulières de la glycémie ou de la glycosurie (deux fois par semaine au début, par exemple) sont également recommandées et peuvent être réalisées par le propriétaire à domicile si possible.

## Complications de la prise en charge du diabète sucré

### Acidocétose diabétique

Tous les chats présentant une cétonémie et une cétonurie ne souffrent pas nécessairement d'acidocétose diabétique, mais les chats en acidocétose diabétique auront un pH sanguin bas et seront mal en point. Un chat cétosique non acidosique pourra être traité comme un chat non cétosique, mais si une acidocétose diabétique est présente, une hospitalisation immédiate avec traitement et suivi intensifs sera nécessaire. Les principaux objectifs du traitement consistent à :

- ❖ Corriger la déshydratation et les déficits électrolytiques.
- ❖ Corriger l'acidose (par l'ajout de bicarbonates uniquement si une fluidothérapie adaptée ne suffit pas).
- ❖ Apporter des quantités adaptées d'insuline pour normaliser le métabolisme intermédiaire (c'est-à-dire progressivement stopper la cétoxygénèse et réduire l'hyperglycémie).
- ❖ Apporter une source de glucides par voie parentérale en cas de vomissements et quand cela s'avère nécessaire au cours de l'insulinothérapie.
- ❖ Identifier les facteurs qui accélèrent (infection, par exemple) le processus pathologique.

Pour ces chats, une préparation d'insuline à action courte (insuline ordinaire/soluble, par exemple) est généralement administrée soit par voie intramusculaire (IM) soit par perfusion intraveineuse.<sup>114</sup> S'il n'est pas possible de se procurer de l'insuline ordinaire/soluble, il est suggéré de donner de la glargine en IM ou IV (intraveineuse),<sup>115</sup> bien que nous manquions de données de qualité sur son efficacité par ces voies d'administration. Quand le chat est stabilisé, l'insuline à action courte est remplacée par une insuline à action prolongée administrée par voie sous-cutanée et le chat est pris en charge comme un chat diabétique stable.

### Hypoglycémie

L'hypoglycémie (glycémie < 3,0 mmol/l [54 mg/dl]), potentiellement plus fréquente chez les chats que chez les chiens diabétiques,<sup>116</sup> peut engager le pronostic vital et doit être traitée rapidement. Il faut informer les propriétaires de ses signes (convulsions, décubitus, anorexie, tremblements, vomissements, ataxie, léthargie, par exemple) et des premiers soins à apporter à domicile (incluant l'application généreuse de miel ou de glucose sur les muqueuses). Idéalement, les propriétaires doivent toujours avoir chez eux des gels de dextrose (disponibles en pharmacie humaine) au cas où il y aurait une hypoglycémie.

L'hypoglycémie sévère semble être plus fréquente chez les chats recevant des doses d'insuline > 6 U/chat,<sup>116</sup> et nécessite une prise en charge à la clinique avec une supplémentation parentérale en glucose. Une solution de dextrose à 50 % doit

**Les vétérinaires doivent être vigilants et surveiller l'apparition éventuelle de complications diabétiques ou la présence de maladie(s) concomitante(s), notamment si la réponse au traitement est mauvaise ou irrégulière.**

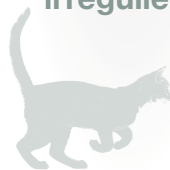

#### Un chat diabétique doit être jugé instable dans les cas suivants :

- ❖ Besoin élevé d'insuline (> 1,5 U/kg par dose)
- ❖ Augmentation inexplicable des besoins en insuline chez un chat diabétique précédemment stable
- ❖ Hypoglycémie inattendue pendant la stabilisation ou chez un chat diabétique précédemment stable
- ❖ Réponse glycémique difficile à contrôler avec des valeurs de glycémie incompatibles avec les signes cliniques du chat

être diluée au 1/2, et une dose initiale de 2–4 ml de cette solution à 25 % (c'est-à-dire 0,5–1,0 g de glucose) doit être administrée lentement en IV sur 5 à 10 minutes. La glycémie doit être surveillée et du dextrose sera ré-administré jusqu'à obtenir l'effet souhaité. L'euglycémie doit entraîner une amélioration clinique rapide, mais le traitement doit quand même être suivi d'une perfusion à débit constant de dextrose à 5 % ajustée de façon à maintenir l'euglycémie avec une surveillance étroite la glycémie. Des antagonistes de l'insuline, tels que les corticoïdes, ou une perfusion de glucagon peuvent également être utilisés.

Si l'insulinothérapie doit être reprise, cela devra se faire avec prudence et sous surveillance étroite.

### Le chat diabétique instable

Bien qu'une discussion détaillée sur le chat diabétique instable dépasse le cadre de ces Recommandations, un chat diabétique instable doit clairement faire l'objet d'explorations complémentaires. Leur nature exacte peut varier selon les problèmes rencontrés, et la présence d'autres maladies concomitantes actuelles ou antérieures.

Les explorations à envisager incluent :

- ❖ Vérification du mode de conservation et d'administration de l'insuline par le propriétaire.
- ❖ Révision de l'historique du diabète pour évaluer :
  - La dose de départ d'insuline.
  - Le type d'insuline, sa durée d'action et le nadir de glycémie.
    - La période de temps sur laquelle la dose d'insuline a été augmentée et son degré d'augmentation.
    - Les courbes de glycémie (courbes à domicile versus courbes à la clinique).
    - Les résultats des dosages de fructosamine.
    - Le suivi des signes cliniques, l'évolution du poids, l'historique alimentaire, et les autres traitements reçus par le chat.
- ❖ Examens complémentaires à envisager pour rechercher une maladie concomitante, incluant :
  - Examen clinique, avec évaluation du poids et du score d'état corporel.
  - Analyse et culture urinaires.
  - Numération formule sanguine et biochimie sérique.
    - Imagerie diagnostique (incluant l'évaluation du pancréas).
    - Dosage de la lipase pancréatique féline (DGGR ou Spec fPL, par exemple).<sup>117–119</sup>
    - Recherche d'une acromégalie (dosage du facteur insulino-mimétique [IGF-1], de l'hormone de croissance, par exemple).
  - Evaluation de la fonction thyroïdienne (dosage de la T4 totale, par exemple).
  - Evaluation de la fonction surrénalienne (test de freination par la dexaméthasone faible dose, par exemple).

## Ressources pédagogiques à destination des propriétaires

Parmi les ressources disponibles en ligne, citons le site internet de l'International Cat Care ([www.icatcare.org](http://www.icatcare.org)) et leur chaîne YouTube ([www.youtube.com/user/iCatCare](http://www.youtube.com/user/iCatCare)). Ils intègrent plusieurs vidéos montrant comment mesurer la glycémie, injecter l'insuline et prélever et tester de l'urine, entre autres (voir ci-dessous).

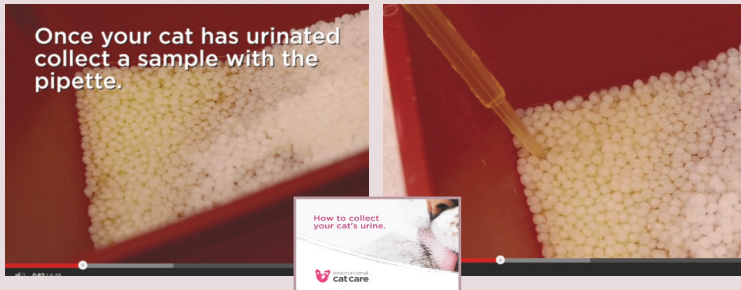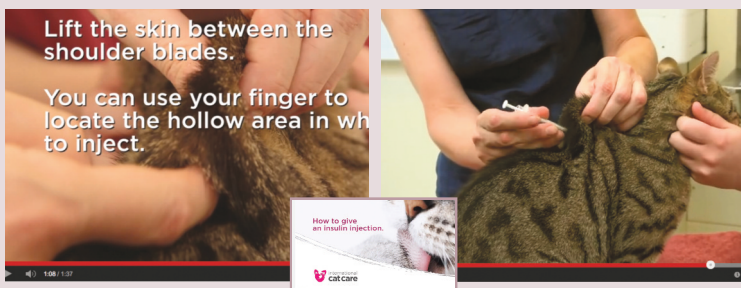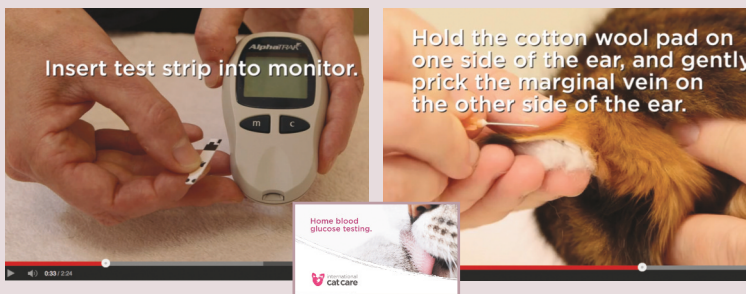

Des documents papier ou des références en ligne doivent être fournies aux propriétaires de chats diabétiques.

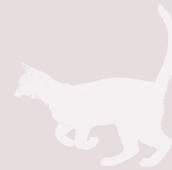

### Remerciements

L'ISFM souhaite remercier Boehringer Ingelheim, qui a contribué au développement de ces Recommandations.

### Financement

Ces Recommandations ont bénéficié d'une subvention éducative versée par Boehringer Ingelheim à l'ISFM.

### Conflit d'intérêt

Les membres du Panel n'ont aucun conflit d'intérêt à déclarer.

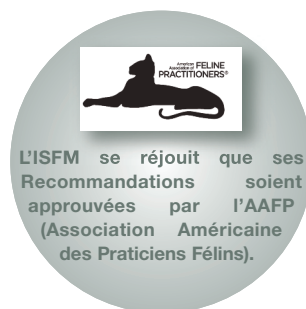

L'ISFM se réjouit que ses Recommandations soient approuvées par l'AAFP (Association Américaine des Praticiens Félines).

### Références

- 1 Baral RM, Rand JS, Catt MJ, et al. **Prevalence of feline diabetes mellitus in a feline private practice.** *J Vet Intern Med* 2003; 17: 433–434.
- 2 McCann TM, Simpson KE, Shaw DJ, et al. **Feline diabetes mellitus in the UK: the prevalence within an insured cat population and a questionnaire-based putative risk factor analysis.** *J Feline Med Surg* 2007; 9: 289–299.
- 3 Sallander M, Eliasson J and Hedhammar Å. **Prevalence and risk factors for the development of diabetes mellitus in Swedish cats.** *Acta Vet Scand* 2012; 54: 61.
- 4 Prah A, Guptill L, Glickman NW, et al. **Time trends and risk factors for diabetes mellitus in cats presented to veterinary teaching hospitals.** *J Feline Med Surg* 2007; 9: 351–358.
- 5 Callegari C, Mercuriali E, Hafner M, et al. **Survival time and**

- prognostic factors in cats with newly diagnosed diabetes mellitus: 114 cases (2000–2009). *J Am Vet Med Assoc* 2013; 243: 91–95.
- 6 Goossens MM, Nelson RW, Feldman EC, et al. Response to insulin treatment and survival in 104 cats with diabetes mellitus (1985–1995). *J Vet Intern Med* 1998; 12: 1–6.
  - 7 Kraus MS, Calvert CA, Jacobs GJ, et al. Feline diabetes mellitus: a retrospective mortality study of 55 cats (1982–1994). *J Am Anim Hosp Assoc* 1997; 33: 107–111.
  - 8 Hoenig M. Carbohydrate metabolism and pathogenesis of diabetes mellitus in dogs and cats. *Prog Mol Biol Transl Sci* 2014; 121: 377–412.
  - 9 Nelson RW and Reusch CE. Animal models of disease: classification and etiology of diabetes in dogs and cats. *J Endocrinol* 2014; 222: T1–T9.
  - 10 Osto M, Zini E, Reusch CE, et al. Diabetes from humans to cats. *Gen Comp Endocrinol* 2013; 182: 48–53.
  - 11 Rand JS. Pathogenesis of feline diabetes. *Vet Clin North Am Small Anim Pract* 2013; 43: 221–231.
  - 12 Hoenig M, Reusch C and Peterson ME. Beta cell and insulin antibodies in treated and untreated diabetic cats. *Vet Immunol Immunopathol* 2000; 77: 93–102.
  - 13 Webb CB and Falkowski L. Oxidative stress and innate immunity in feline patients with diabetes mellitus: the role of nutrition. *J Feline Med Surg* 2009; 11: 271–276.
  - 14 Zini E, Osto M, Moretti S, et al. Hyperglycaemia but not hyperlipidaemia decreases serum amylase and increases neutrophils in the exocrine pancreas of cats. *Res Vet Sci* 2010; 89: 20–26.
  - 15 Hoenig M, Thomaseth K, Waldron M, et al. Insulin sensitivity, fat distribution, and adipocytokine response to different diets in lean and obese cats before and after weight loss. *Am J Physiol Regul Integr Comp Physiol* 2007; 292: R227–R234.
  - 16 Appleton DJ, Rand JS and Sunvold GD. Insulin sensitivity decreases with obesity, and lean cats with low insulin sensitivity are at greatest risk of glucose intolerance with weight gain. *J Feline Med Surg* 2001; 3: 211–228.
  - 17 Mori A, Sako T, Lee P, et al. Comparison of three commercially available prescription diet regimens on short-term post-prandial serum glucose and insulin concentrations in healthy cats. *Vet Res Commun* 2009; 33: 669–680.
  - 18 Panciera DL, Thomas CB, Eicker SW, et al. Epizootiologic patterns of diabetes mellitus in cats: 333 cases (1980–1986). *J Am Vet Med Assoc* 1990; 197: 1504–1508.
  - 19 Scarlett JM and Donoghue S. Associations between body condition and disease in cats. *J Am Vet Med Assoc* 1998; 212: 1725–1731.
  - 20 Lederer R, Rand JS, Jonsson NN, et al. Frequency of feline diabetes mellitus and breed predisposition in domestic cats in Australia. *Vet J* 2009; 179: 254–258.
  - 21 Rand JS, Bobbermien LM, Hendrikz JK, et al. Over representation of Burmese cats with diabetes mellitus. *Aust Vet J* 1997; 75: 402–405.
  - 22 Slingerland LI, Fazilova VV, Plantinga EA, et al. Indoor confinement and physical inactivity rather than the proportion of dry food are risk factors in the development of feline type 2 diabetes mellitus. *Vet J* 2009; 179: 247–253.
  - 23 Crenshaw KL, Peterson ME, Heeb LA, et al. Serum fructosamine concentration as an index of glycemia in cats with diabetes mellitus and stress hyperglycemia. *J Vet Intern Med* 1996; 10: 360–364.
  - 24 Lowe AD, Campbell KL and Graves T. Glucocorticoids in the cat. *Vet Dermatol* 2008; 19: 340–347.
  - 25 Peterson ME. Effects of megestrol acetate on glucose tolerance and growth hormone secretion in the cat. *Res Vet Sci* 1987; 42: 354–357.
  - 26 Link KR and Rand JS. Changes in blood glucose concentration are associated with relatively rapid changes in circulating fructosamine concentrations in cats. *J Feline Med Surg* 2008; 10: 583–592.
  - 27 Plier ML, Grindem CB, MacWilliams PS, et al. Serum fructosamine concentration in nondiabetic and diabetic cats. *Vet Clin Pathol* 1998; 27: 34–39.
  - 28 Reusch CE and Haberer B. Evaluation of fructosamine in dogs and cats with hypo- or hyperproteinaemia, azotaemia, hyperlipidaemia and hyperbilirubinaemia. *Vet Rec* 2001; 148: 370–376.
  - 29 Forcada Y, German AJ, Noble PJ, et al. Determination of serum fPLI concentrations in cats with diabetes mellitus. *J Feline Med Surg* 2008; 10: 480–487.
  - 30 Niessen SJ, Powney S, Guitian J, et al. Evaluation of a quality-of-life tool for cats with diabetes mellitus. *J Vet Intern Med* 2010; 24: 1098–1105.
  - 31 Kruth SA and Cowgill LD. Renal glucose transport in the cat [abstract]. Proceedings of the American College of Veterinary Internal Medicine Forum, 1982, p 78.
  - 32 Link KR, Allio I, Rand JS, et al. The effect of experimentally induced chronic hyperglycaemia on serum and pancreatic insulin, pancreatic islet IGF-I and plasma and urinary ketones in the domestic cat (*Felis felis*). *Gen Comp Endocrinol* 2013; 188: 269–281.
  - 33 Marshall RD, Rand JS and Morton JM. Treatment of newly diagnosed diabetic cats with glargine insulin improves glycaemic control and results in higher probability of remission than protamine zinc and lente insulins. *J Feline Med Surg* 2009; 11: 683–691.
  - 34 Nack R and DeClue AE. In cats with newly diagnosed diabetes mellitus, use of a near-euglycemic management paradigm improves remission rate over a traditional paradigm. *Vet Q* 2014; 25: 1–5.
  - 35 Roomp K and Rand J. Intensive blood glucose control is safe and effective in diabetic cats using home monitoring and treatment with glargine. *J Feline Med Surg* 2009; 11: 668–682.
  - 36 Roomp K and Rand J. Evaluation of detemir in diabetic cats managed with a protocol for intensive blood glucose control. *J Feline Med Surg* 2012; 14: 566–572.
  - 37 McMillan FD and Feldman EC. Rebound hyperglycemia following overdosing of insulin in cats with diabetes mellitus. *J Am Vet Med Assoc* 1986; 188: 1426–1431.
  - 38 Biourge V, Nelson RW, Feldman EC, et al. Effect of weight gain and subsequent weight loss on glucose tolerance and insulin response in healthy cats. *J Vet Intern Med* 1997; 11: 86–91.
  - 39 Mazzaferro EM, Greco DS, Turner AS, et al. Treatment of feline diabetes mellitus using an alpha-glucosidase inhibitor and a low-carbohydrate diet. *J Feline Med Surg* 2003; 5: 183–189.
  - 40 Tvarijonaviciute A, Ceron JJ, Holden SL, et al. Effects of weight loss in obese cats on biochemical analytes related to inflammation and glucose homeostasis. *Domest Anim Endocrinol* 2012; 42: 129–141.
  - 41 Wei A, Fascetti AJ, Villaverde C, et al. Effect of water content in a canned food on voluntary food intake and body weight in cats. *Am J Vet Res* 2011; 72: 918–923.
  - 42 Buckley CM, Hawthorne A, Colyer A, et al. Effect of dietary water intake on urinary output, specific gravity and relative supersaturation for calcium oxalate and struvite in the cat. *Br J Nutr* 2011; 106 Suppl 1: S128–S130.
  - 43 Carciofi AC, Bazzoli RS and Zanni A. Influence of water content and the digestibility of pet foods on the water balance of cats. *Braz J Vet Res Anim Sci* 2005; 42: 429–434.
  - 44 Seefeldt SL and Chapman TE. Body water content and turnover in cats fed dry and canned rations. *Am J Vet Res* 1979; 40: 183–185.
  - 45 Bennett N, Greco DS, Peterson ME, et al. Comparison of a low carbohydrate–low fiber diet and a moderate carbohydrate–high fiber diet in the management of feline diabetes mellitus. *J Feline Med Surg* 2006; 8: 73–84.

- 46 Hall TD, Mahony O, Rozanski EA, et al. **Effects of diet on glucose control in cats with diabetes mellitus treated with twice daily insulin glargine.** *J Feline Med Surg* 2009; 11: 125–130.
- 47 de-Oliveira LD, Carciofi AC, Oliveira MC, et al. **Effects of six carbohydrate sources on diet digestibility and postprandial glucose and insulin responses in cats.** *J Anim Sci* 2008; 86: 2237–2246.
- 48 Farrow HA, Rand JS, Morton JM, et al. **Effect of dietary carbohydrate, fat, and protein on postprandial glycemia and energy intake in cats.** *J Vet Intern Med* 2013; 27: 1121–1135.
- 49 Hewson-Hughes AK, Gilham MS, Upton S, et al. **The effect of dietary starch level on postprandial glucose and insulin concentrations in cats and dogs.** *Br J Nutr* 2011; 106 Suppl 1: S105–S109.
- 50 Mimura K, Mori A, Lee P, et al. **Impact of commercially available diabetic prescription diets on short-term postprandial serum glucose, insulin, triglyceride and free fatty acid concentrations of obese cats.** *J Vet Med Sci* 2013; 75: 929–937.
- 51 Appleton DJ, Rand JS, Priest J, et al. **Dietary carbohydrate source affects glucose concentrations, insulin secretion, and food intake in overweight cats.** *Nutr Res* 2004; 24: 447–467.
- 52 Farrow H, Rand JS, Morton JM, et al. **Postprandial glycaemia in cats fed a moderate carbohydrate meal persists for a median of 12 hours – female cats have higher peak glucose concentrations.** *J Feline Med Surg* 2012; 14: 706–715.
- 53 Kienzle E. **Blood sugar levels and renal sugar excretion after the intake of high carbohydrate diets in cats.** *J Nutr* 1994; 124: 2563S–2567S.
- 54 Martin GJ and Rand JS. **Food intake and blood glucose in normal and diabetic cats fed ad libitum.** *J Feline Med Surg* 1999; 1: 241–251.
- 55 Zoran DL and Rand JS. **The role of diet in the prevention and management of feline diabetes.** *Vet Clin North Am Small Anim Pract* 2013; 43: 233–243.
- 56 Palm CA and Feldman EC. **Oral hypoglycemics in cats with diabetes mellitus.** *Vet Clin North Am Small Anim Pract* 2013; 43: 407–415.
- 57 Feldman EC, Nelson RW and Feldman MS. **Intensive 50-week evaluation of glipizide administration in 50 cats with previously untreated diabetes mellitus.** *J Am Vet Med Assoc* 1997; 210: 772–777.
- 58 Ford SL. **NIDDM in the cat: treatment with the oral hypoglycemic medication, glipizide.** *Vet Clin North Am Small Anim Pract* 1995; 25: 599–615.
- 59 Nelson RW, Feldman EC, Ford SL, et al. **Effect of an orally administered sulfonylurea, glipizide, for treatment of diabetes mellitus in cats.** *J Am Vet Med Assoc* 1993; 203: 821–827.
- 60 Bennett N, Papich MG, Hoenig M, et al. **Evaluation of transdermal application of glipizide in a pluronic lecithin gel to healthy cats.** *Am J Vet Res* 2005; 66: 581–588.
- 61 Mori A, Lee P, Yamashita T, et al. **Effect of glimepiride and nateglinide on serum insulin and glucose concentration in healthy cats.** *Vet Res Commun* 2009; 33: 957–970.
- 62 Hoenig M, Hall G, Ferguson D, et al. **A feline model of experimentally induced islet amyloidosis.** *Am J Pathol* 2000; 157: 2143–2150.
- 63 Gilor C, Graves TK, Gilor S, et al. **The GLP-1 mimetic exenatide potentiates insulin secretion in healthy cats.** *Domest Anim Endocrinol* 2011; 41: 42–49.
- 64 Padruitt I, Zini E, Kaufmann K, et al. **Comparison of the GLP-1 analogues exenatide short-acting, exenatide long-acting and the DPP-4 inhibitor sitagliptin to increase insulin secretion in healthy cats [abstract].** *J Vet Intern Med* 2012; 26: 1520–1521.
- 65 Reusch C and Padruitt I. **New incretin hormonal therapies in humans relevant to diabetic cats.** *Vet Clin North Am Small Anim Pract* 2013; 43: 417–433.
- 66 Singh R, Rand JS, Coradini M, et al. **Effect of acarbose on postprandial blood glucose concentrations in healthy cats fed low and high carbohydrate diets.** *J Feline Med Surg.* Epub ahead of print 24 October 2014. DOI: 1098612X14556559.
- 67 Nelson R, Spann D, Elliott D, et al. **Evaluation of the oral anti-hyperglycemic drug metformin in normal and diabetic cats.** *J Vet Intern Med* 2004; 18: 18–24.
- 68 Michels GM, Boudinot FD, Ferguson DC, et al. **Pharmacokinetics of the antihyperglycemic agent metformin in cats.** *Am J Vet Res* 1999; 60: 738–742.
- 69 Michels GM, Boudinot FD, Ferguson DC, et al. **Pharmacokinetics of the insulin-sensitizing agent troglitazone in cats.** *Am J Vet Res* 2000; 61: 775–778.
- 70 Clark M, Thomaseth K, Dirikolu L, et al. **Effects of pioglitazone on insulin sensitivity and serum lipids in obese cats.** *J Vet Intern Med* 2014; 28: 166–174.
- 71 Hoenig M and Ferguson DC. **Effect of darglitazone on glucose clearance and lipid metabolism in obese cats.** *Am J Vet Res* 2003; 64: 1409–1413.
- 72 Appleton DJ, Rand JS, Sunvold GD, et al. **Dietary chromium tripicolinate supplementation reduces glucose concentrations and improves glucose tolerance in normal-weight cats.** *J Feline Med Surg* 2002; 4: 13–25.
- 73 Cohn LA, Dodam JR, McCaw DL, et al. **Effects of chromium supplementation on glucose tolerance in obese and nonobese cats.** *Am J Vet Res* 1999; 60: 1360–1363.
- 74 Fondacaro JV, Greco DS and Crans DC. **Treatment of feline diabetes mellitus with protamine zinc aniline insulin (PZI) alone compared with PZI and oral vanadium diphosphate [abstract].** *J Vet Intern Med* 1999; 13: 244.
- 75 Marshall RD, Rand JS and Morton JM. **Insulin glargine has a long duration of effect following administration either once daily or twice daily in divided doses in healthy cats.** *J Feline Med Surg* 2008; 10: 488–494.
- 76 Martin GJ and Rand JS. **Pharmacology of a 40 IU/ml porcine lente insulin preparation in diabetic cats: findings during the first week and after 5 or 9 weeks of therapy.** *J Feline Med Surg* 2001; 3: 23–30.
- 77 Michiels L, Reusch CE, Boari A, et al. **Treatment of 46 cats with porcine lente insulin – a prospective, multicentre study.** *J Feline Med Surg* 2008; 10: 439–451.
- 78 Broussard JD and Peterson ME. **Comparison of two ultralente insulin preparations with protamine zinc insulin in clinically normal cats.** *Am J Vet Res* 1994; 55: 127–131.
- 79 Marshall RD, Rand JS and Morton JM. **Glargine and protamine zinc insulin have a longer duration of action and result in lower mean daily glucose concentrations than lente insulin in healthy cats.** *J Vet Pharmacol Ther* 2008; 31: 205–212.
- 80 Nelson RW, Lynn RC, Wagner-Mann CC, et al. **Efficacy of protamine zinc insulin for treatment of diabetes mellitus in cats.** *J Am Vet Med Assoc* 2001; 218: 38–42.
- 81 Nelson RW, Henley K and Cole C. **Field safety and efficacy of protamine zinc recombinant human insulin for treatment of diabetes mellitus in cats.** *J Vet Intern Med* 2009; 23: 787–793.
- 82 Wallace MS, Peterson ME and Nichols CE. **Absorption kinetics of regular, isophane, and protamine zinc insulin in normal cats.** *Domest Anim Endocrinol* 1990; 7: 509–515.
- 83 Gilor C, Ridge TK, Attermeier KJ, et al. **Pharmacodynamics of insulin detemir and insulin glargine assessed by an isoglycemic clamp method in healthy cats.** *J Vet Intern Med* 2010; 24: 870–874.
- 84 Gilor C and Graves TK. **Synthetic insulin analogs and their use in dogs and cats.** *Vet Clin North Am Small Anim Pract* 2010; 40: 297–307.

## ARTICLE SPÉCIAL / Recommandations de l'ISFM pour la prise en charge du diabète sucré

- 85 Roomp K and Rand JS. **Management of diabetic cats with long-acting insulin.** *Vet Clin North Am Small Anim Pract* 2013; 43: 251–266.
- 86 Borin-Crivellenti S, Bonagura JD and Gilor C. **Comparison of precision and accuracy of U100 and U40 insulin syringes [abstract].** *J Vet Intern Med* 2014; 28: 1029.
- 87 Burgaud S, Riant S and Piau N. **Comparative laboratory evaluation of dose delivery using a veterinary insulin injection pen.** Proceedings of the British Small Animal Veterinary Association Congress [poster]; 2012 April 12–15; Birmingham, UK.
- 88 Dietiker-Moretti S, Muller C, Sieber-Ruckstuhl N, et al. **Comparison of a continuous glucose monitoring system with a portable blood glucose meter to determine insulin dose in cats with diabetes mellitus.** *J Vet Intern Med* 2011; 25: 1084–1088.
- 89 Hafner M, Lutz TA, Reusch CE, et al. **Evaluation of sensor sites for continuous glucose monitoring in cats with diabetes mellitus.** *J Feline Med Surg* 2013; 15: 117–123.
- 90 Kley S, Casella M and Reusch CE. **Evaluation of long-term home monitoring of blood glucose concentrations in cats with diabetes mellitus: 26 cases (1999–2002).** *J Am Vet Med Assoc* 2004; 225: 261–266.
- 91 Reusch CE, Kley S and Casella M. **Home monitoring of the diabetic cat.** *J Feline Med Surg* 2006; 8: 119–127.
- 92 Casella M, Hassig M and Reusch CE. **Home-monitoring of blood glucose in cats with diabetes mellitus: evaluation over a 4-month period.** *J Feline Med Surg* 2005; 7: 163–171.
- 93 Casella M, Wess G and Reusch CE. **Measurement of capillary blood glucose concentrations by pet owners: a new tool in the management of diabetes mellitus.** *J Am Anim Hosp Assoc* 2002; 38: 239–245.
- 94 Wess G and Reusch C. **Capillary blood sampling from the ear of dogs and cats and use of portable meters to measure glucose concentration.** *J Small Anim Pract* 2000; 41: 60–66.
- 95 Zeugswetter FK, Rebuzzi L and Karlovits S. **Alternative sampling site for blood glucose testing in cats: giving the ears a rest.** *J Feline Med Surg* 2010; 12: 710–713.
- 96 Alt N, Kley S, Haessig M, et al. **Day-to-day variability of blood glucose concentration curves generated at home in cats with diabetes mellitus.** *J Am Vet Med Assoc* 2007; 230: 1011–1017.
- 97 Zini E, Moretti S, Tschuor F, et al. **Evaluation of a new portable glucose meter designed for the use in cats.** *Schweiz Arch Tierheilkd* 2009; 151: 448–451.
- 98 Dobromylskyj MJ and Sparkes AH. **Assessing portable blood glucose meters for clinical use in cats in the United Kingdom.** *Vet Rec* 2010; 167: 438–442.
- 99 Domori A, Sunahara A, Tateno M, et al. **The clinical utility of two human portable blood glucose meters in canine and feline practice.** *Vet Clin Pathol* 2014; 43: 55–62.
- 100 Wess G and Reusch C. **Assessment of five portable blood glucose meters for use in cats.** *Am J Vet Res* 2000; 61: 1587–1592.
- 101 Hoelmkjaer KM, Spodsberg EM and Bjornvad CR. **Insulin detemir treatment in diabetic cats in a practice setting.** *J Feline Med Surg* 2015; 17: 144–151.
- 102 Martin GJ and Rand JS. **Comparisons of different measurements for monitoring diabetic cats treated with porcine insulin zinc suspension.** *Vet Rec* 2007; 161: 52–58.
- 103 Finco DR, Adams DD, Crowell WA, et al. **Food and water intake and urine composition in cats: influence of continuous versus periodic feeding.** *Am J Vet Res* 1986; 47: 1638–1642.
- 104 Grant DC. **Effect of water source on intake and urine concentration in healthy cats.** *J Feline Med Surg* 2010; 12: 431–434.
- 105 Hashimoto M, Funaba M, Abe M, et al. **Dietary protein levels affect water intake and urinary excretion of magnesium and phosphorus in laboratory cats.** *Exp Anim* 1995; 44: 29–35.
- 106 Kane E, Rogers QR and Morris JG. **Feeding behavior of the cat fed laboratory and commercial diets.** *Nutr Res* 1981; 1: 499–507.
- 107 Kane E, Leung PM, Rogers QR, et al. **Diurnal feeding and drinking patterns of adult cats as affected by changes in the level of fat in the diet.** *Appetite* 1987; 9: 89–98.
- 108 Xu H, Laflamme DP and Long GL. **Effects of dietary sodium chloride on health parameters in mature cats.** *J Feline Med Surg* 2009; 11: 435–441.
- 109 Elliott DA, Nelson RW, Reusch CE, et al. **Comparison of serum fructosamine and blood glycosylated hemoglobin concentrations for assessment of glycemic control in cats with diabetes mellitus.** *J Am Vet Med Assoc* 1999; 214: 1794–1798.
- 110 Norsworthy GD, Lynn R and Cole C. **Preliminary study of protamine zinc recombinant insulin for the treatment of diabetes mellitus in cats.** *Vet Ther* 2009; 10: 24–28.
- 111 Thoresen SI and Bredal WP. **Clinical usefulness of fructosamine measurements in diagnosing and monitoring feline diabetes mellitus.** *J Small Anim Pract* 1996; 37: 64–68.
- 112 Gilor C, Graves TK, Lascelles BD, et al. **The effects of body weight, body condition score, sex, and age on serum fructosamine concentrations in clinically healthy cats.** *Vet Clin Pathol* 2010; 39: 322–328.
- 113 Reusch CE and Tomsa K. **Serum fructosamine concentration in cats with overt hyperthyroidism.** *J Am Vet Med Assoc* 1999; 215: 1297–1300.
- 114 Marshall RD, Rand JS, Gunew MN, et al. **Intramuscular glargine with or without concurrent subcutaneous administration for treatment of feline diabetic ketoacidosis.** *J Vet Emerg Crit Care (San Antonio)* 2013; 23: 286–290.
- 115 Rand JS. **Diabetic ketoacidosis and hyperosmolar hyperglycemic state in cats.** *Vet Clin North Am Small Anim Pract* 2013; 43: 367–379.
- 116 Whitley NT, Drobatz KJ and Panciera DL. **Insulin overdose in dogs and cats: 28 cases (1986–1993).** *J Am Vet Med Assoc* 1997; 211: 326–330.
- 117 Oppliger S, Hartnack S, Riond B, et al. **Agreement of the serum Spec fPL and 1,2-o-dilauryl-rac-glycero-3-glutaric acid-(6'-methylresorufin) ester lipase assay for the determination of serum lipase in cats with suspicion of pancreatitis.** *J Vet Intern Med* 2013; 27: 1077–1082.
- 118 Oppliger S, Hartnack S, Reusch CE, et al. **Agreement of serum feline pancreas-specific lipase and colorimetric lipase assays with pancreatic ultrasonographic findings in cats with suspicion of pancreatitis: 161 cases (2008–2012).** *J Am Vet Med Assoc* 2014; 244: 1060–1065.
- 119 Xenoulis PG and Steiner JM. **Canine and feline pancreatic lipase immunoreactivity.** *Vet Clin Pathol* 2012; 41: 312–324.

Cette réimpression est une traduction de la version originale anglaise publiée dans le *Journal of Feline Medicine and Surgery (JFMS)*, Volume 17, 2015. Les propriétaires, éditeurs et rédacteurs du *JFMS*, et les auteurs des recommandations, déclinent toute responsabilité concernant les erreurs qui ont pu être accidentellement introduites lors de la traduction.

Disponible en ligne sur [jfms.com](http://jfms.com)
